# Supplementary material
Source: PubMed Central journal article supplement (PMC5951629)
Supplement: NIHMS954034-supplement-002037_-_Supplemental_Material.pdf [file NIHMS954034-supplement-002037_-_Supplemental_Material.pdf]

# SUPPLEMENTAL MATERIAL

**Supplementary Table 1. Genotyping platforms for the participating studies**

| Ancestry          | Study                                                                  | Abbreviation        | Study design       | Genotyping array                   | Genotype calling algorithm                                       | Inclusion criteria for SNPs |           |                   | Inclusion/exclusion criteria |                                                                                                      | #SNPs that met QC criteria | Analysis software version |
|-------------------|------------------------------------------------------------------------|---------------------|--------------------|------------------------------------|------------------------------------------------------------------|-----------------------------|-----------|-------------------|------------------------------|------------------------------------------------------------------------------------------------------|----------------------------|---------------------------|
|                   |                                                                        |                     |                    |                                    |                                                                  | MAF                         | Call rate | P for HWE         | Call rate                    | Exclusions (e.g., IBS clustering, Mendelian checks, excess heterozygosity)                           |                            |                           |
| European ancestry | Age, Gene/Environment Susceptibility Study                             | AGES <sup>1</sup>   | Population-based   | Illumina HumanExome v.1.0 BeadChip | GenomeStudio combined with the CHARGE joint calling <sup>2</sup> | ≥0%                         | ≥95%      | NA                | ≥95%                         | Mismatched reference genotypes; sex mismatch                                                         | 238015                     | seqMeta v.1.6             |
|                   | Atherosclerosis Risk in Communities study                              | ARIC <sup>3</sup>   | Population-based   | Illumina HumanExome Beadchip v1.0  | GenomeStudio combined with the CHARGE joint calling <sup>2</sup> | ≥0%                         | ≥95%      | N/A               | ≥89.9%                       | Plink sex check; relatedness PI_HAT>0.4; genetic cluster check                                       | 233,238                    | seqMeta v1.6.0            |
|                   | British Genetics of Hypertension                                       | BRIGHT <sup>4</sup> | Hypertensive Cases | Illumina Human Exome BeadChip v1.0 | GenCall + Zcall                                                  | ≥0%                         | ≥99%      | >10 <sup>-4</sup> | ≥95% (GenCall), ≥98% (zCall) | Het: separately <1%, >1% MAF, excl ± 3 SD; IBD: excl. by PI_HAT>0.25; sex mismatch; GWAS discordance | 245,322                    | seqMeta v1.3              |
|                   | Massachusetts General Hospital Cardiology and Metabolic Patient cohort | CAMP <sup>5</sup>   | Population-based   | Illumina HumanExome Beadchip v1.0  | GeneCall + Zcall                                                 | ≥0%                         | ≥95%      | >10 <sup>-6</sup> | ≥95%                         | N/A                                                                                                  | 235,081                    | seqMeta v1.6.0            |
|                   | Cardiovascular Health Study                                            | CHS <sup>6</sup>    | Population-based   | Illumina HumanExome Beadchip v1.0  | GenomeStudio combined with the CHARGE joint calling <sup>2</sup> | ≥0%                         | ≥95%      | N/A               | ≥97%                         | N/A                                                                                                  | 227,006                    | seqMeta v1.6.0            |

| Ancestry | Study                                                              | Abbreviation          | Study design            | Genotyping array                    | Genotype calling algorithm                                       | Inclusion criteria for SNPs |      |                   | Inclusion/exclusion criteria |                                                                                                                                                                     | #SNPs that met | Analysis software |
|----------|--------------------------------------------------------------------|-----------------------|-------------------------|-------------------------------------|------------------------------------------------------------------|-----------------------------|------|-------------------|------------------------------|---------------------------------------------------------------------------------------------------------------------------------------------------------------------|----------------|-------------------|
|          |                                                                    |                       |                         |                                     |                                                                  | >0%                         | ≥95% | NA                | ≥95%                         | Heterozygous haploid genotypes set to missing; SNPs not present in CHARGE recode file                                                                               |                |                   |
|          | Erasmus Rucphen Family Study                                       | ERF <sup>7</sup>      | Population-based family | Illumina Human Exome BeadChip v1.1  | BeadStudio and zCall                                             | >0%                         | ≥95% | NA                | ≥95%                         | Heterozygous haploid genotypes set to missing; SNPs not present in CHARGE recode file                                                                               | 242,848        | seqMeta v1.6.0    |
|          | Framingham Heart Study                                             | FHS <sup>8</sup>      | Population-based        | Illumina HumanExome Beadchip v1.0   | GenomeStudio combined with the CHARGE joint calling <sup>2</sup> | ≥0%                         | ≥95% | N/A               | ≥97%                         | N/A                                                                                                                                                                 | 247,501        | seqMeta v1.6.0    |
|          | Genes for Cerebral Hemorrhage on Anticoagulation                   | GOCHA <sup>9</sup>    | Population-based        | Illumina HumanExome Beadchip v1.0_A | GenCall + Zcall                                                  | ≥0%                         | ≥95% | >10 <sup>-6</sup> | ≥95%                         | N/A                                                                                                                                                                 | 240,977        | seqMeta v1.5.0    |
|          | Genetic Regulation of Arterial Pressure In Humans in the Community | GRAPHIC <sup>10</sup> | Population-based        | Illumina Human Exome BeadChip v1.0  | GenCall + Zcall                                                  | ≥ 0%                        | ≥95% | >10 <sup>-4</sup> | ≥95%                         | Mismatch reference genotypes, Sex mismatch                                                                                                                          | 246,194        | seqMeta v.1.6.0   |
|          | INTER99 study                                                      | INTER99 <sup>11</sup> | Population-based        | Illumina HumanExome Beadchip v1.0   | GenCall + Zcall                                                  | ≥0%                         | ≥98% | >10 <sup>-6</sup> | ≥95%                         | (1) Heterozygosity was calculated separately for MAF<1% and MAF>1%, and samples were dropped judging by plots; (2) cryptic relatedness (related to ≥20 individuals) | 224,872        | seqMeta v1.5      |
|          | Cooperative Health Research in the Region Augsburg                 | KORA <sup>12</sup>    | Population-based        | Illumina HumanExome Beadchip v1.0   | GenCall+ChargeCluster File                                       | NA                          | ≥95% | NA                | No exclusion                 | Exclusion of samples with PI_HAT>0.1875                                                                                                                             | 232,832        | seqMeta           |

| Ancestry | Study                                   | Abbreviation            | Study design       | Genotyping array                          | Genotype calling algorithm   | Inclusion criteria for SNPs |      |                   | Inclusion/exclusion criteria |                                                                                                                                                                                                                                                                                         | #SNPs that met | Analysis software |
|----------|-----------------------------------------|-------------------------|--------------------|-------------------------------------------|------------------------------|-----------------------------|------|-------------------|------------------------------|-----------------------------------------------------------------------------------------------------------------------------------------------------------------------------------------------------------------------------------------------------------------------------------------|----------------|-------------------|
|          |                                         |                         |                    |                                           |                              | >0.0001                     | ≥98% | >10 <sup>-6</sup> | >95%                         | N/A                                                                                                                                                                                                                                                                                     |                |                   |
|          | CROATIA-Korcula                         | Korcula <sup>13</sup>   | Isolate population | Illumina HumanHap 370CNV DUO/QUAD Phase 1 | Beadstudio-Gencall v3.0      | >0.0001                     | ≥98% | >10 <sup>-6</sup> | >95%                         | N/A                                                                                                                                                                                                                                                                                     | 236,308        | seqMeta v1.6.0    |
|          | LifeLines Cohort Study                  | LifeLines <sup>14</sup> | Population-based   | Illumina HumanExome Beadchip v1.1         | GeneCall + Zcall             | ≥0%                         | ≥95% | >10 <sup>-6</sup> | ≥95%                         | Exclusion based on PCA and mean IBS                                                                                                                                                                                                                                                     | 240888         | seqMeta v1.6.0    |
|          | Utrecht Health Project                  | UHP <sup>15</sup>       | Population-based   | Illumina HumanExome BeadChip v1.1         | GenomeStudio + zCall         | ≥0%                         | ≥95% | >10 <sup>-3</sup> | ≥95%                         | Discordant sex; heterozygosity (keeping samples within 4 SD from the mean); related samples (randomly removing one sample until there were no samples with IBD>0.2); samples from non-European descent (based on manual inspection of PCA results that were calculated with Eigensoft). | 241,173        | seqMeta v1.6.0    |
|          | Multi-Ethnic Study of Atherosclerosis   | MESA <sup>16</sup>      | Population-based   | Illumina HumanExome Beadchip v1.0         | GeneCall + Zcall             | ≥0%                         | ≥95% | >10 <sup>-6</sup> | ≥95%                         | N/A                                                                                                                                                                                                                                                                                     | 235,081        | seqMeta v1.6.0    |
|          | The Netherlands Epidemiology of Obesity | NEO <sup>17</sup>       | Population-based   | Illumina HumanCoreExome-24v1-0            | GeneCall                     | ≥0%                         | ≥98% | >10 <sup>-6</sup> | ≥98%                         | Outlying individuals were excluded on the basis of relatedness; non-European ancestry; sex discrepancy; heterozygosity.                                                                                                                                                                 | 209,874        | seqMeta v1.5      |
|          | Rotterdam Study                         | RS <sup>18</sup>        | Population-based   | Illumina HumanExome BeadChip v1.0         | Illumina GenomeStudio20 11.1 | N/A                         | ≥95% | N/A               | ≥95%                         | N/A                                                                                                                                                                                                                                                                                     | 236,783        | seqMeta v1.6.5    |

| Ancestry | Study                                             | Abbreviation          | Study design                                  | Genotyping array                                             | Genotype calling algorithm                          | Inclusion criteria for SNPs |      |                   | Inclusion/exclusion criteria |                                                                                                                                                                                                                                  | #SNPs that met | Analysis software |
|----------|---------------------------------------------------|-----------------------|-----------------------------------------------|--------------------------------------------------------------|-----------------------------------------------------|-----------------------------|------|-------------------|------------------------------|----------------------------------------------------------------------------------------------------------------------------------------------------------------------------------------------------------------------------------|----------------|-------------------|
|          |                                                   |                       |                                               |                                                              |                                                     | >0.0001                     | ≥98% | >10 <sup>-6</sup> | ≥97%                         |                                                                                                                                                                                                                                  |                |                   |
|          | Generation Scotland: Scottish Family Health Study | GS:SFHS <sup>19</sup> | Population-based with enrichment for families | HumanOmniExpressExome8v1-2_A and HumanOmniExpressExome-8v1_A | Beadstudio-Gencall v3.0                             | >0.0001                     | ≥98% | >10 <sup>-6</sup> | ≥97%                         | N/A                                                                                                                                                                                                                              | 234,035        | seqMeta v1.6.0    |
|          | Study of Health in Pomerania                      | SHIP <sup>20</sup>    | Population-based                              | Illumina HumanExome Beadchip v1.0                            | Gencall (Illumina Genome Studio), followed by zCall | ≥0%                         | ≥95% | >10 <sup>-4</sup> | ≥98%                         | High heterozygosity and/or implausibly high cryptic relatedness; IBS clustering; unexpected duplicates; sex mismatches                                                                                                           | 247,039        | seqMeta v1.3      |
|          | TwinsUK                                           | TwinsUK <sup>21</sup> | Twin study                                    | Illumina HumanExome Beadchip HumanExome 12v1.0               | Gencall                                             | ≥0%                         | ≥95% | >10 <sup>-6</sup> | ≥97%                         | Autosomal heterozygosity outliers (+/- 4SD (calculated for variants with MAF <1% and MAF ≥1% separately) , gender mismatches, ethnic outliers as determined by combining with 1000 Genomes Project data (PCA), GWAS concordance) | 246,001        | seqMeta v1.3      |
|          | Women's Health Initiative                         | WHI <sup>22</sup>     | Population-based                              | Illumina HumanExome Beadchip v1.0                            | GeneCall + Zcall                                    | NA                          | >95% | NA                | NA                           | First degree relatives                                                                                                                                                                                                           | 246303         | seqMeta           |
|          | Young Finns Study                                 | YFS <sup>23</sup>     | Population-based                              | Illumina HumanCoreExome-12 Beadchip v1.0                     | GenCall                                             | ≥0%                         | ≥95% | >10 <sup>-6</sup> | ≥95%                         | IBS clustering                                                                                                                                                                                                                   | 238,194        | seqMeta v1.3      |

| Ancestry         | Study                                     | Abbreviation       | Study design                      | Genotyping array                  | Genotype calling algorithm                                       | Inclusion criteria for SNPs |      |                   | Inclusion/exclusion criteria |                                                                       | #SNPs that met | Analysis software          |
|------------------|-------------------------------------------|--------------------|-----------------------------------|-----------------------------------|------------------------------------------------------------------|-----------------------------|------|-------------------|------------------------------|-----------------------------------------------------------------------|----------------|----------------------------|
|                  |                                           |                    |                                   |                                   |                                                                  | ≥0%                         | ≥95% | N/A               | ≥89.9%                       | Plink sex check; relatedness PI_HAT>0.4; genetic cluster check        |                |                            |
| African ancestry | Atherosclerosis Risk in Communities study | ARIC <sup>3</sup>  | Population-based                  | Illumina HumanExome Beadchip v1.0 | GenomeStudio combined with the CHARGE joint calling <sup>2</sup> | ≥0%                         | ≥95% | N/A               | ≥89.9%                       | Plink sex check; relatedness PI_HAT>0.4; genetic cluster check        | 233,238        | seqMeta v1.6.0             |
|                  | Cardiovascular Health Study               | CHS <sup>6</sup>   | Population-based                  | Illumina HumanExome Beadchip v1.0 | GenomeStudio combined with the CHARGE joint calling <sup>2</sup> | ≥0%                         | ≥95% |                   | ≥97%                         | N/A                                                                   | 227,006        | seqMeta v1.6.0             |
|                  | Jackson Heart Study                       | JHS <sup>24</sup>  | Mixed family and population-based | Illumina HumanExome Beadchip v1.0 | GenomeStudio combined with the CHARGE joint calling <sup>2</sup> | ≥0%                         | ≥95% | >10 <sup>-6</sup> | ≥95%                         | Duplicate samples; sex mismatch; inbreeding coefficient F>0.2 or <0.2 | 234,937        | R (3.1.0), seqMeta (1.6.0) |
|                  | MESA                                      | MESA <sup>16</sup> | Population-based                  | Illumina HumanExome Beadchip v1.0 | GeneCall + Zcall                                                 | ≥0%                         | ≥95% | >10 <sup>-6</sup> | ≥95%                         | N/A                                                                   | 235,081        | seqMeta v1.6.0             |
|                  | Women's Health Initiative                 | WHI <sup>22</sup>  | Population-based                  | Illumina HumanExome Beadchip v1.0 | GeneCall + Zcall                                                 | NA                          | >95% | NA                | NA                           | First degree relatives                                                | 246303         | seqMeta                    |

**Supplementary Table 2. Association of top variants with PR interval by random-effect meta-analysis**

| SNP         | Closest gene     | SNP call rate in FHS | P-value (Random effect) | P-value (Heterogeneity test) |
|-------------|------------------|----------------------|-------------------------|------------------------------|
| rs6795970   | <i>SCN10A</i>    | 1.000                | 1.11E-37                | <0.0001                      |
| rs3922844   | <i>SCN5A</i>     | 1.000                | 7.10E-20                | <0.0001                      |
| rs3807989   | <i>CAV1</i>      | 1.000                | 5.16E-24                | <0.0001                      |
| rs7660702   | <i>ARHGAP24</i>  | 1.000                | 3.18E-18                | <0.0001                      |
| rs17287293  | <i>LINC00477</i> | 1.000                | 6.65E-12                | <0.0001                      |
| rs11897119  | <i>MEIS1</i>     | 0.997                | 1.61E-13                | 2.23E-02                     |
| rs1896312   | <i>TBX3</i>      | 1.000                | 2.33E-17                | 1.46E-01                     |
| rs883079    | <i>TBX5</i>      | 1.000                | 7.63E-09                | 2.20E-03                     |
| rs116202356 | <i>DLEC1</i>     | 1.000                | 2.01E-16                | 2.36E-01                     |
| rs251253    | <i>CREBRF</i>    | 1.000                | 1.56E-08                | 5.30E-03                     |
| rs11153730  | <i>SLC35F1</i>   | 1.000                | 1.86E-13                | 2.10E-01                     |
| rs35658696  | <i>PAM</i>       | 1.000                | 3.50E-09                | 1.15E-01                     |
| rs2070492   | <i>SLC22A14</i>  | 1.000                | 7.24E-07                | 1.53E-02                     |
| rs2585897   | <i>XPO4</i>      | 1.000                | 6.44E-13                | 4.40E-01                     |
| rs2042995   | <i>TTN</i>       | 1.000                | 4.34E-11                | 6.98E-01                     |
| rs4399693   | <i>ID2</i>       | 1.000                | 2.43E-07                | 1.39E-01                     |
| rs41306688  | <i>ADPRHL1</i>   | 1.000                | 7.36E-09                | 5.64E-01                     |
| rs4745      | <i>EFNA1</i>     | 1.000                | 1.15E-04                | 6.09E-02                     |
| rs11078078  | <i>LINC00670</i> | 1.000                | 3.59E-06                | 1.07E-01                     |
| rs60632610  | <i>SYNPO2L</i>   | 1.000                | 4.53E-08                | 9.34E-01                     |
| rs11848785  | <i>SIPA1L1</i>   | 0.999                | 4.58E-08                | 6.44E-01                     |
| rs3733414   | <i>FAT1</i>      | 1.000                | 4.81E-08                | 6.63E-01                     |
| rs17362588  | <i>CCDC141</i>   | 1.000                | 2.01E-05                | 1.62E-01                     |
| rs2296172   | <i>MACF1</i>     | 1.000                | 1.14E-07                | 8.26E-01                     |
| rs9398652   | <i>GJA1</i>      | 1.000                | 1.29E-07                | 7.26E-01                     |
| rs442177    | <i>AFF1</i>      | 1.000                | 1.82E-07                | 7.20E-01                     |
| rs7002002   | <i>PLEC</i>      | 1.000                | 2.06E-07                | 5.47E-01                     |
| rs1768208   | <i>MOBP</i>      | 1.000                | 3.57E-07                | 7.03E-01                     |
| rs2119788   | <i>HAND2</i>     | 0.999                | 5.76E-05                | 1.82E-01                     |
| rs17391905  | <i>C1orf185</i>  | 1.000                | 9.61E-07                | 6.62E-01                     |
| rs524295    | <i>ALDH18A1</i>  | 1.000                | 9.75E-07                | 7.76E-01                     |

**Supplementary Table 3. Biological significance of PR-related genes**

| Locus number | Gene             | Prior GWAS associations                                                                   | Other disease associations                                                                                                                           | Biological function                                                                                                                                                                                                            | Relation to the heart                                                                                  |
|--------------|------------------|-------------------------------------------------------------------------------------------|------------------------------------------------------------------------------------------------------------------------------------------------------|--------------------------------------------------------------------------------------------------------------------------------------------------------------------------------------------------------------------------------|--------------------------------------------------------------------------------------------------------|
| 1            | <i>SCN10A</i>    | PR interval, <sup>25,26</sup> QRS duration <sup>26,27</sup>                               | Brugada syndrome, <sup>28</sup> episodic pain syndrome, <sup>29</sup> Pit Hopkins syndrome <sup>30</sup>                                             | Sodium voltage-gated channel alpha subunit 10; mediates upstroke of action potential in neurons. <sup>31</sup>                                                                                                                 | Present in cardiac ganglia <sup>31</sup>                                                               |
| 2            | <i>SCN5A</i>     | PR interval <sup>32,33</sup>                                                              | LQT3, <sup>34</sup> BrS, <sup>34</sup> sinus node dysfunction, <sup>34</sup> AF, <sup>35</sup> DCM, <sup>36</sup> familial heart block <sup>37</sup> | Responsible for peak inward Na current that underlies upstroke of the cardiac action potential. <sup>38</sup>                                                                                                                  | See Biological function                                                                                |
| 3            | <i>CAV1</i>      | PR interval, <sup>26,39</sup> atrial fibrillation, <sup>40</sup> PR segment <sup>41</sup> | Congenital lipodystrophy type 3, <sup>42</sup> primary pulmonary hypertension 3, <sup>43</sup> LCCNS <sup>44</sup>                                   | CAV1 is a main component of caveolae (plasma membrane “rafts”). <sup>45</sup> Caveolins are important for cell cycle progression. CAV1 also plays an important role in insulin receptor stabilization. <sup>46</sup>           | See GWAS associations; also has a potential role in vascular remodeling and inflammation <sup>47</sup> |
| 4            | <i>ARHGAP24</i>  | PR interval <sup>26</sup>                                                                 | Focal segmental glomerulosclerosis <sup>48</sup>                                                                                                     | Encodes Rho GTPase-activating protein 24. It antagonizes RAC through binding to filamin A, <sup>49</sup> and has highest expression in podocyte adhesions in the kidney. <sup>48</sup>                                         | Prior GWAS association only.                                                                           |
| 5            | <i>LINC00477</i> | Heart rate <sup>50,51</sup>                                                               |                                                                                                                                                      | Long intergenic non-protein coding RNA 477. Linc-RNAs are involved in cell-cycle regulation, transcription and metabolism. <sup>52</sup>                                                                                       | Prior GWAS association only                                                                            |
| 6            | <i>MEIS1</i>     | PR interval <sup>39</sup>                                                                 | Restless legs syndrome <sup>53-55</sup>                                                                                                              | Encodes a homeodomain containing transcription factor.                                                                                                                                                                         | Required for normal cardiac development; regulates cardiomyocyte cell cycle <sup>56</sup> .            |
| 7            | <i>TBX3</i>      | PR interval <sup>39</sup>                                                                 | Ulnar mammary syndrome <sup>57</sup>                                                                                                                 | Encodes a T-box containing transcription factor. It specifies sino-atrial node development, and represses the atrial gene program in the region of the AV node. <sup>58</sup>                                                  | VSD and WPW reported in a family with TBX3 mutation <sup>57</sup> .                                    |
| 8            | <i>TBX5</i>      | QRS duration <sup>59</sup>                                                                | Holt-Oram syndrome, <sup>60</sup> atrial fibrillation, <sup>61</sup> tetralogy of Fallot <sup>62</sup>                                               | Encodes a T-box containing transcription factor. It interacts with NKX2.5 and GATA4 to regulate cardiomyocyte differentiation. <sup>63,64</sup> It is required for development of the cardiac conduction system. <sup>65</sup> | See Other disease associations and Biological function                                                 |
| 9            | <i>DLEC1</i>     |                                                                                           | Lung, esophageal and renal carcinoma <sup>66</sup>                                                                                                   | Postulated to be a tumor suppressor. <sup>66</sup>                                                                                                                                                                             |                                                                                                        |
| 10           | <i>CREBRF</i>    | PR interval <sup>39</sup>                                                                 |                                                                                                                                                      | Encodes a leucine zipper protein that promotes degradation of <i>CREB3</i> , and is involved in the unfolded protein response. <sup>67</sup>                                                                                   | Highest expression in the heart and kidney <sup>67</sup> .                                             |

| Locus number | Gene                | Prior GWAS associations                                | Other disease associations                                                                                                                                                                                                                                                                                                                                        | Biological function                                                                                                                                                                                                                                                                                   | Relation to the heart                                                                                                                                                                                        |
|--------------|---------------------|--------------------------------------------------------|-------------------------------------------------------------------------------------------------------------------------------------------------------------------------------------------------------------------------------------------------------------------------------------------------------------------------------------------------------------------|-------------------------------------------------------------------------------------------------------------------------------------------------------------------------------------------------------------------------------------------------------------------------------------------------------|--------------------------------------------------------------------------------------------------------------------------------------------------------------------------------------------------------------|
| 11           | PLN/ <i>SLC35F1</i> | QT interval, <sup>68,69</sup> heart rate <sup>50</sup> | Possibly neurodevelopmental disorders <sup>70</sup>                                                                                                                                                                                                                                                                                                               | <i>PLN</i> encodes phospholamban, which interacts with the cAMP-dependent protein kinase in the heart. The SNP is in strong linkage disequilibrium ( $R^2=0.87$ ) with SNP rs11153768, which was previously reported to be associated with left ventricle internal diastolic dimension. <sup>71</sup> | Prior GWAS association only                                                                                                                                                                                  |
| 12           | <i>PAM</i>          | Type 2 diabetes <sup>72,73</sup>                       | <i>Pam</i> null mice do not survive gestation. <sup>74</sup>                                                                                                                                                                                                                                                                                                      | Encodes a protein that catalyzes the conversion of neuroendocrine peptides into alpha-amidated products <sup>75</sup>                                                                                                                                                                                 | High levels of mRNA in rat heart atria; <sup>76</sup> expression in H9c2 rat cardiac myoblasts displaying developmental regulation <sup>77</sup>                                                             |
| 13           | <i>SLC22A14</i>     |                                                        |                                                                                                                                                                                                                                                                                                                                                                   | May play a role in organic cation transport in various tissues <sup>78</sup>                                                                                                                                                                                                                          |                                                                                                                                                                                                              |
| 14           | <i>XPO4</i>         |                                                        | Associated with non-alcoholic steatohepatitis; <sup>79</sup> also behaves as a tumor suppressor <sup>80</sup>                                                                                                                                                                                                                                                     | Encodes a member of the exportin family, which mediates nuclear export of protein cargoes <sup>81</sup>                                                                                                                                                                                               | <i>XPO4</i> variant carriers may have smaller infarcts, due to better glucose uptake by the heart. <sup>82</sup>                                                                                             |
| 15           | <i>TTN</i>          | QT interval <sup>68</sup>                              | Implicated in a number of cardio- and skeletal-myopathies, including: DCM, <sup>83</sup> HFpEF, <sup>84</sup> arrhythmogenic right ventricular dysplasia, <sup>85</sup> late-onset TMD, <sup>86</sup> limb-girdle muscular dystrophy type 2, <sup>87</sup> hereditary myopathy with early respiratory failure, <sup>88</sup> centronuclear myopathy <sup>89</sup> | Plays a major role within the sarcomere in striated muscle, providing structural support during contraction, and regulating passive tension during stretching; also involved in cellular processes such as biomechanical sensing and signaling <sup>90</sup>                                          | Plays a role in cardiac development, health, and disease (see GWAS and disease associations); <sup>90</sup> major contributor to myocyte passive stiffness <sup>84</sup>                                     |
| 16           | <i>ID2</i>          |                                                        | Upregulated and/or overexpressed in the development and progression of tumors in prostate, <sup>91</sup> epidermis, <sup>92</sup> colon, <sup>93</sup> and pancreas, <sup>94</sup> as well as neuroblastoma. <sup>95</sup>                                                                                                                                        | Regulates cell growth through inhibition of cell differentiation and stimulation of cell proliferation; <sup>96,97</sup> also negatively regulates basic helix-loop-helix gene products <sup>96</sup>                                                                                                 | Expressed in the outflow tract, endocardial cushions, and valves of the developing murine heart <sup>98,99</sup>                                                                                             |
| 17           | <i>ADPRHL1</i>      |                                                        |                                                                                                                                                                                                                                                                                                                                                                   | Reverses ADP-ribosylation, a posttranslational modification that regulates protein function <sup>100</sup>                                                                                                                                                                                            | mRNA expression induced in hESC differentiation to cardiomyocytes; <sup>101</sup> acts during cardiogenesis in xenopus embryos to modify heart chamber outgrowth and myofibril directionality <sup>102</sup> |



| Locus number | Gene             | Prior GWAS associations                                                                                                                                                                                                                                                       | Other disease associations                                                                                                                                            | Biological function                                                                                                                                                                                                                                                                                                                       | Relation to the heart                                                           |
|--------------|------------------|-------------------------------------------------------------------------------------------------------------------------------------------------------------------------------------------------------------------------------------------------------------------------------|-----------------------------------------------------------------------------------------------------------------------------------------------------------------------|-------------------------------------------------------------------------------------------------------------------------------------------------------------------------------------------------------------------------------------------------------------------------------------------------------------------------------------------|---------------------------------------------------------------------------------|
| 18           | <i>EFNA1</i>     | Association with prostate cancer susceptibility was implicated by SNPs, but the association was ultimately mapped to <i>KCNN3</i> ; <sup>103</sup> obesity related traits <sup>104</sup> (but not at genome wide significance); plasma levels of liver enzymes <sup>105</sup> |                                                                                                                                                                       | Ligand that binds to the EPH group of receptor tyrosine kinases                                                                                                                                                                                                                                                                           |                                                                                 |
| 19           | <i>LINC00670</i> | Response to amphetamines (relatively close SNP) <sup>106</sup>                                                                                                                                                                                                                |                                                                                                                                                                       | Encodes a long intergenic non-protein coding RNA 670                                                                                                                                                                                                                                                                                      | Associated with torsades de pointes <sup>107</sup>                              |
| 20           | <i>SYNPO2L</i>   | Susceptibility locus for atrial fibrillation; <sup>40</sup> whole exome sequencing for AF <sup>108</sup>                                                                                                                                                                      | Susceptibility to AF                                                                                                                                                  | Encodes an actin-associated protein that may modulate actin shape                                                                                                                                                                                                                                                                         | Atrial fibrillation <sup>40,108</sup>                                           |
| 21           | <i>SIPA1L1</i>   | FEV1/FVC in COPD; <sup>109</sup> mitral valve prolapse <sup>110</sup>                                                                                                                                                                                                         | COPD; mitral valve prolapse                                                                                                                                           | Stimulates the RAP2A GTPase and promotes reorganization of the actin cytoskeleton; recruits DLG4 to F-actin.                                                                                                                                                                                                                              | Mitral valve prolapse <sup>110</sup>                                            |
| 22           | <i>FAT1</i>      | Chronotype <sup>111</sup> obesity; <sup>112</sup> -Alzheimer disease (intergenic) <sup>113</sup>                                                                                                                                                                              | Glomerulotubular nephropathy; <sup>114</sup> -multiple types of cancer <sup>115</sup>                                                                                 | Plays an essential role for cellular polarization, directed cell migration, and modulating cell-cell contact; member of the cadherin family;. plays a role as a tumor suppressor gene                                                                                                                                                     |                                                                                 |
| 23           | <i>CCDC141</i>   | Heart rate <sup>50</sup>                                                                                                                                                                                                                                                      |                                                                                                                                                                       |                                                                                                                                                                                                                                                                                                                                           |                                                                                 |
| 24           | <i>MACF1</i>     | HDL cholesterol <sup>116</sup> , type 2 diabetes <sup>117</sup>                                                                                                                                                                                                               | Knockdown of <i>MACF1</i> caused developmental retardation and embryonic death in mice <sup>118</sup> and failure of oocyte polarization in zebrafish. <sup>119</sup> | Encodes a member of the spectraplakin family, <sup>120</sup> which plays an important role in calcium ion binding and cardiomyocyte microtubule distribution; <sup>121</sup> also involved in the regulation of the cytoskeletal response to environmental signaling cues <sup>122</sup> and directional cell movement <sup>123,124</sup> | Expressed in a variety of tissues, including the heart and lungs <sup>125</sup> |

| Locus number | Gene            | Prior GWAS associations                                                                               | Other disease associations                                                                                                                                                                                                                                                                                                                                                                                                                                            | Biological function                                                                                                                      | Relation to the heart                                                                                                                                                                                                                  |
|--------------|-----------------|-------------------------------------------------------------------------------------------------------|-----------------------------------------------------------------------------------------------------------------------------------------------------------------------------------------------------------------------------------------------------------------------------------------------------------------------------------------------------------------------------------------------------------------------------------------------------------------------|------------------------------------------------------------------------------------------------------------------------------------------|----------------------------------------------------------------------------------------------------------------------------------------------------------------------------------------------------------------------------------------|
| 25           | <i>GJA1</i>     | Resting heart rate, <sup>51,126</sup> -heart rate <sup>50</sup>                                       | Genetic variation in <i>GJA1</i> may affect protein kinase phosphorylation and disrupt cell communication. <sup>127</sup> Reductions in <i>GJA1</i> have been implicated in arrhythmia predisposition. <sup>128</sup> -Various anomalies were observed in <i>Gja1</i> knockout mice, such as conotruncal heart malformation and outflow obstruction. <sup>129</sup> Mutations in <i>GJA1</i> may also cause congenital heart disease and viscerotaxia. <sup>130</sup> | Encodes a gap junction protein known as connexin 43                                                                                      | Highly expressed in ventricular myocardium -- essential to coronary artery development -- and is involved in electrical conduction and synchronization of heart contraction <sup>131</sup>                                             |
| 26           | <i>AFF1</i>     | Triglycerides <sup>132-134</sup>                                                                      | Gene associated with leukemia <sup>135</sup>                                                                                                                                                                                                                                                                                                                                                                                                                          | Encodes a member of the AF4/ lymphoid nuclear family                                                                                     |                                                                                                                                                                                                                                        |
| 27           | <i>PLEC</i>     | Post bronchodilator FEV1, <sup>109</sup> cholesterol, <sup>132</sup> fibrinogen levels <sup>136</sup> |                                                                                                                                                                                                                                                                                                                                                                                                                                                                       | Encodes plectin, a giant, multi-domain protein involved in cell structure and shape that also regulates a variety of signaling complexes |                                                                                                                                                                                                                                        |
| 28           | <i>MOBP</i>     | Progressive supranuclear palsy <sup>137</sup>                                                         |                                                                                                                                                                                                                                                                                                                                                                                                                                                                       | Encodes myelin-associated oligodendrocyte basic protein, which is important for stabilization of the myelin sheath.                      |                                                                                                                                                                                                                                        |
| 29           | <i>HAND2</i>    |                                                                                                       | Dysfunction can result in pathological hypertrophy and heart failure <sup>138</sup> and stenosis of the right ventricle. <sup>139</sup> Gene knockdown resulted in extra-embryonic abnormalities. <sup>140</sup>                                                                                                                                                                                                                                                      | Encodes a transcription factor that binds to a heart- and neural crest derivatives-expressed proteins                                    | The gene regulates cardiac morphogenesis and ventricular cardiomyocyte expansion during heart development. <sup>141-143</sup> Another gene in the same family, <i>HAND1</i> , was associated with QRS interval duration. <sup>59</sup> |
| 30           | <i>C1orf185</i> | QRS duration, <sup>59</sup> FEV1 in COPD <sup>109</sup>                                               |                                                                                                                                                                                                                                                                                                                                                                                                                                                                       | Encodes an RNA expressed in the testis                                                                                                   |                                                                                                                                                                                                                                        |
| 31           | <i>ALDH18A1</i> | Blood metabolites, <sup>144</sup> <i>Staphylococcus aureus</i> carriage <sup>145</sup>                | Neurodegeneration, <sup>146</sup> cutis laxa; cataracts; DeBary syndrome; spastic paraplegia                                                                                                                                                                                                                                                                                                                                                                          | Encodes a mitochondrial enzyme that catalyzes a critical step in proline, ornithine, and arginine synthesis                              | Mutations have been linked to decreased collagens I and III <sup>147</sup>                                                                                                                                                             |

Supplementary Table 4. Association of PR-related variants with AF and P-wave indices

| SNP                     | Locus    | Closest gene     | Coding allele | CAF* | PR-interval |       |          | AF     |       |         | P-wave duration |       |         | P-wave terminal force |      |         |
|-------------------------|----------|------------------|---------------|------|-------------|-------|----------|--------|-------|---------|-----------------|-------|---------|-----------------------|------|---------|
|                         |          |                  |               |      | Beta        | SE    | P value  | Beta   | SE    | P value | Beta            | SE    | P value | Beta                  | SE   | P value |
| rs6795970               | 3p22.2   | <i>SCN10A</i>    | A             | 0.37 | 0.171       | 0.005 | 4.0E-240 | -0.072 | 0.016 | 5.4E-06 | 1.14            | 0.089 | 7.3E-38 | -0.1                  | 12.5 | 1.0E+00 |
| rs3922844               | 3p22.2   | <i>SCN5A</i>     | A             | 0.34 | -0.107      | 0.005 | 9.3E-90  | 0.048  | 0.017 | 5.4E-03 | -1.058          | 0.09  | 3.1E-32 | 21.2                  | 12.8 | 9.8E-02 |
| rs3807989               | 7q31.2   | <i>CAV1</i>      | A             | 0.43 | 0.091       | 0.005 | 3.0E-74  | -0.086 | 0.016 | 6.5E-08 | 0.538           | 0.084 | 1.5E-10 | 18.5                  | 12   | 1.2E-01 |
| rs7660702               | 4q21.23  | <i>ARHGAP24</i>  | C             | 0.33 | -0.092      | 0.005 | 1.2E-68  | 0.004  | 0.015 | 8.0E-01 | 0.09            | 0.088 | 3.0E-01 | 22.3                  | 12.8 | 8.3E-02 |
| rs17287293              | 12p12.1  | <i>LINC00477</i> | G             | 0.14 | -0.108      | 0.007 | 1.9E-52  | -0.105 | 0.022 | 2.1E-06 | -0.505          | 0.12  | 2.7E-05 | 17.8                  | 16.9 | 2.9E-01 |
| rs11897119              | 2p14     | <i>MEIS1</i>     | C             | 0.39 | 0.057       | 0.006 | 4.2E-25  | 0.016  | 0.017 | 3.6E-01 | 0.126           | 0.087 | 1.5E-01 | -7.5                  | 12.4 | 5.5E-01 |
| rs1896312               | 12q24.21 | <i>TBX3</i>      | G             | 0.28 | 0.056       | 0.006 | 8.7E-25  | -0.037 | 0.014 | 7.2E-03 | 0.002           | 0.093 | 9.8E-01 | -6                    | 13.2 | 6.5E-01 |
| rs883079                | 12q24.21 | <i>TBX5</i>      | G             | 0.29 | 0.055       | 0.005 | 4.5E-24  | -0.085 | 0.018 | 1.7E-06 | 0.612           | 0.094 | 8.3E-11 | -39.4                 | 13.5 | 3.6E-03 |
| rs116202356             | 3p22.2   | <i>DLEC1</i>     | A             | 0.02 | -0.195      | 0.02  | 1.0E-22  | 0.079  | 0.055 | 1.5E-01 | -1.72           | 0.434 | 7.3E-05 | 61.6                  | 60.9 | 3.1E-01 |
| rs251253                | 5q35.1   | <i>CREBRF</i>    | G             | 0.42 | -0.044      | 0.005 | 4.7E-18  | -0.034 | 0.017 | 3.8E-02 | -0.075          | 0.088 | 3.9E-01 | -15.5                 | 12.6 | 2.2E-01 |
| rs11153730              | 6q22.31  | <i>SLC35F1</i>   | C             | 0.47 | -0.042      | 0.005 | 9.5E-18  | -0.059 | 0.014 | 1.9E-05 | 0.276           | 0.083 | 9.4E-04 | 8.2                   | 11.9 | 4.9E-01 |
| rs35658696              | 5q21.1   | <i>PAM</i>       | G             | 0.04 | 0.096       | 0.012 | 8.5E-16  | 0.074  | 0.037 | 4.9E-02 | -0.046          | 0.272 | 8.7E-01 | -71.5                 | 38   | 6.0E-02 |
| rs2070492               | 3p22.2   | <i>SLC22A14</i>  | T             | 0.1  | 0.062       | 0.008 | 4.0E-14  | -0.023 | 0.026 | 3.7E-01 | 0.864           | 0.158 | 4.8E-08 | 28.3                  | 22.8 | 2.2E-01 |
| rs2585897               | 13q12.11 | <i>XPO4</i>      | A             | 0.17 | 0.047       | 0.006 | 2.8E-13  | -0.003 | 0.021 | 8.8E-01 | -0.207          | 0.115 | 7.1E-02 | 18.6                  | 16.5 | 2.6E-01 |
| rs2042995               | 2q31.2   | <i>TTN</i>       | C             | 0.26 | 0.038       | 0.006 | 4.3E-11  | 0.059  | 0.018 | 1.0E-03 | 0.308           | 0.097 | 1.5E-03 | 42.9                  | 13.9 | 2.1E-03 |
| rs4399693               | 2p25.1   | <i>ID2</i>       | A             | 0.34 | 0.037       | 0.006 | 9.1E-11  | 0.004  | 0.017 | 8.4E-01 | 0.095           | 0.107 | 3.8E-01 | -0.6                  | 14.7 | 9.7E-01 |
| rs41306688              | 13q34    | <i>ADPRHL1</i>   | C             | 0.03 | 0.1         | 0.017 | 7.4E-09  | 0.057  | 0.044 | 2.0E-01 | -0.401          | 0.477 | 4.0E-01 | 30.1                  | 67.2 | 6.5E-01 |
| rs4745                  | 1q22     | <i>EFNA1</i>     | T             | 0.49 | 0.03        | 0.005 | 1.2E-08  | 0.023  | 0.014 | 1.0E-01 | 0.042           | 0.094 | 6.6E-01 | -5                    | 12.8 | 7.0E-01 |
| rs11078078              | 17p12    | <i>LINC00670</i> | A             | 0.4  | 0.028       | 0.005 | 2.2E-08  | -0.022 | 0.016 | 1.7E-01 | -0.045          | 0.088 | 6.1E-01 | 4.5                   | 12.6 | 7.2E-01 |
| rs60632610              | 10q22.2  | <i>SYNPO2L</i>   | T             | 0.15 | -0.037      | 0.007 | 4.5E-08  | -0.11  | 0.017 | 1.5E-10 | 0.324           | 0.137 | 1.8E-02 | 40.4                  | 19.4 | 3.7E-02 |
| rs11848785              | 14q24.2  | <i>SIPA1L1</i>   | G             | 0.24 | 0.032       | 0.006 | 4.6E-08  | 0.032  | 0.018 | 7.7E-02 | -0.018          | 0.099 | 8.5E-01 | 10.4                  | 13.9 | 4.5E-01 |
| rs3733414               | 4q35.2   | <i>FAT1</i>      | A             | 0.38 | 0.028       | 0.005 | 4.8E-08  | -0.011 | 0.016 | 4.9E-01 | -0.098          | 0.087 | 2.6E-01 | -11.2                 | 12.6 | 3.7E-01 |
| rs17362588              | 2q31.2   | <i>CCDC141</i>   | A             | 0.08 | -0.049      | 0.009 | 5.5E-08  | 0.001  | 0.027 | 9.8E-01 | -0.035          | 0.153 | 8.2E-01 | -19.4                 | 21.4 | 3.7E-01 |
| rs2296172               | 1p34.3   | <i>MACF1</i>     | G             | 0.2  | 0.033       | 0.006 | 1.1E-07  | 0.025  | 0.019 | 1.8E-01 | -0.055          | 0.107 | 6.1E-01 | 20.4                  | 15   | 1.7E-01 |
| rs9398652               | 6q22.31  | <i>GJA1</i>      | A             | 0.14 | 0.039       | 0.007 | 1.3E-07  | -0.064 | 0.017 | 1.1E-04 | -0.033          | 0.121 | 7.8E-01 | -24.8                 | 17.9 | 1.7E-01 |
| rs442177                | 4q22.1   | <i>AFF1</i>      | C             | 0.42 | -0.026      | 0.005 | 1.8E-07  | -0.01  | 0.013 | 4.4E-01 | 0.072           | 0.084 | 3.9E-01 | 21.5                  | 12.2 | 7.7E-02 |
| rs7002002               | 8q24.3   | <i>PLEC</i>      | A             | 0.38 | -0.027      | 0.005 | 2.1E-07  | -0.016 | 0.014 | 2.7E-01 | 0.07            | 0.103 | 5.0E-01 | 11.4                  | 14.5 | 4.3E-01 |
| rs1768208               | 3p22.1   | <i>MOBP</i>      | T             | 0.25 | 0.029       | 0.006 | 3.6E-07  | -0.017 | 0.014 | 2.0E-01 | 0.153           | 0.102 | 1.3E-01 | -5.4                  | 14.3 | 7.0E-01 |
| rs2119788               | 4q34.1   | <i>HAND2</i>     | C             | 0.52 | -0.025      | 0.005 | 5.6E-07  | 0.024  | 0.015 | 1.1E-01 | -0.145          | 0.091 | 1.1E-01 | 10.8                  | 13.1 | 4.1E-01 |
| rs17391905 <sup>+</sup> | 1p32.3   | <i>C1orf185</i>  | G             | 0.03 | -0.069      | 0.014 | 9.6E-07  | 0.123  | 0.049 | 1.2E-02 | -0.357          | 0.248 | 1.5E-01 | 26.1                  | 37   | 4.8E-01 |
| rs524295                | 10q24.1  | <i>ALDH18A1</i>  | A             | 0.4  | -0.026      | 0.005 | 9.7E-07  | -0.022 | 0.017 | 1.9E-01 | -0.127          | 0.089 | 1.5E-01 | -6.3                  | 12.5 | 6.2E-01 |

**Supplementary Table 5. Significant common variants associated with PR interval for European ancestry**

| SNP        | Locus    | Closest gene     | Function   | Coding allele | CAF* | Beta    | SE     | P value                |
|------------|----------|------------------|------------|---------------|------|---------|--------|------------------------|
| rs6795970  | 3p22.2   | <i>SCN10A</i>    | Missense   | A             | 0.40 | 0.1699  | 0.0053 | 2.1x10 <sup>-228</sup> |
| rs3807989  | 7q31.2   | <i>CAV1</i>      | Intronic   | A             | 0.41 | 0.0940  | 0.0053 | 3.4x10 <sup>-71</sup>  |
| rs7660702  | 4q21.23  | <i>ARHGAP24</i>  | Intronic   | C             | 0.30 | -0.0984 | 0.0056 | 3.4x10 <sup>-68</sup>  |
| rs3922844  | 3p22.2   | <i>SCN5A</i>     | Intronic   | A             | 0.31 | -0.0987 | 0.0057 | 4.8x10 <sup>-67</sup>  |
| rs17287293 | 12p12.1  | <i>LINC00477</i> | Intergenic | G             | 0.15 | -0.1110 | 0.0073 | 8.0x10 <sup>-53</sup>  |
| rs1896312  | 12q24.21 | <i>TBX3</i>      | Intergenic | G             | 0.29 | 0.0590  | 0.0058 | 2.5x10 <sup>-24</sup>  |
| rs11897119 | 2p14     | <i>MEIS1</i>     | Intronic   | C             | 0.39 | 0.0559  | 0.0058 | 5.1x10 <sup>-22</sup>  |
| rs251253   | 5q35.1   | <i>CREBRF</i>    | Intergenic | G             | 0.39 | -0.0473 | 0.0054 | 1.3x10 <sup>-18</sup>  |
| rs883079   | 12q24.21 | <i>TBX5</i>      | UTR3       | G             | 0.28 | 0.0503  | 0.0058 | 4.8x10 <sup>-18</sup>  |
| rs11153730 | 6q22.31  | <i>SLC35F1</i>   | Intergenic | C             | 0.49 | -0.0422 | 0.0051 | 2.2x10 <sup>-16</sup>  |
| rs35658696 | 5q21.1   | <i>PAM</i>       | Missense   | G             | 0.05 | 0.0936  | 0.0120 | 7.7x10 <sup>-15</sup>  |
| rs4399693  | 2p25.1   | <i>ID2</i>       | Intergenic | A             | 0.31 | 0.0453  | 0.0061 | 1.6x10 <sup>-13</sup>  |
| rs2585897  | 13q12.11 | <i>XPO4</i>      | Intronic   | A             | 0.17 | 0.0475  | 0.0068 | 4.0x10 <sup>-12</sup>  |
| rs41306688 | 13q34    | <i>ADPRHL1</i>   | Missense   | C             | 0.04 | 0.1040  | 0.0176 | 3.3x10 <sup>-9</sup>   |
| rs2042995  | 2q31.2   | <i>TTN</i>       | Missense   | C             | 0.23 | 0.0363  | 0.0062 | 4.0x10 <sup>-9</sup>   |
| rs4745     | 1q22     | <i>EFNA1</i>     | Missense   | T             | 0.53 | 0.0306  | 0.0055 | 1.9x10 <sup>-8</sup>   |
| rs3812629  | 10q22.2  | <i>SYNPO2L</i>   | Missense   | A             | 0.15 | -0.0404 | 0.0073 | 2.6x10 <sup>-8</sup>   |
| rs3733415  | 4q35.2   | <i>FAT1</i>      | Missense   | A             | 0.13 | 0.0465  | 0.0084 | 3.2x10 <sup>-8</sup>   |
| rs9398652  | 6q22.31  | <i>GJA1</i>      | Intergenic | A             | 0.10 | 0.0471  | 0.0085 | 3.5x10 <sup>-8</sup>   |
| rs2119788  | 4q34.1   | <i>HAND2</i>     | Intergenic | C             | 0.54 | -0.0281 | 0.0052 | 6.0x10 <sup>-8</sup>   |
| rs442177   | 4q22.1   | <i>AFF1</i>      | Intronic   | C             | 0.41 | -0.0289 | 0.0053 | 6.3x10 <sup>-8</sup>   |
| rs80238762 | 3p22.2   | <i>TTC21A</i>    | Missense   | A             | 0.01 | 0.1186  | 0.0221 | 8.6x10 <sup>-8</sup>   |
| rs524295   | 10q24.1  | <i>ALDH18A1</i>  | Intergenic | A             | 0.35 | -0.0293 | 0.0055 | 1.1x10 <sup>-7</sup>   |
| rs2296172  | 1p34.3   | <i>MACF1</i>     | Missense   | G             | 0.22 | 0.0327  | 0.0062 | 1.6x10 <sup>-7</sup>   |
| rs11848785 | 14q24.2  | <i>SIPA1L1</i>   | Intronic   | G             | 0.25 | 0.0309  | 0.0059 | 1.9x10 <sup>-7</sup>   |
| rs17362588 | 2q31.2   | <i>CCDC141</i>   | Missense   | A             | 0.09 | -0.0476 | 0.0092 | 1.9x10 <sup>-7</sup>   |
| rs11078078 | 17p12    | <i>FLJ34690</i>  | Intronic   | A             | 0.37 | 0.0275  | 0.0053 | 2.4x10 <sup>-7</sup>   |
| rs1768208  | 3p22.1   | <i>MOBP</i>      | Intronic   | T             | 0.28 | 0.0288  | 0.0058 | 5.5x10 <sup>-7</sup>   |
| rs33985936 | 3p22.2   | <i>SCN11A</i>    | Missense   | T             | 0.25 | -0.0297 | 0.0060 | 6.8x10 <sup>-7</sup>   |
| rs7002002  | 8q24.3   | <i>PLEC</i>      | Missense   | A             | 0.41 | -0.0264 | 0.0053 | 7.1x10 <sup>-7</sup>   |

\*Coding allele frequency

**Supplementary Table 6. Significant common variants associated with PR interval for African ancestry**

| SNP       | Locus    | Closest gene  | Function | Coding allele | CAF* | Beta    | SE     | P value               |
|-----------|----------|---------------|----------|---------------|------|---------|--------|-----------------------|
| rs3922844 | 3p22.2   | <i>SCN5A</i>  | Intron   | A             | 0.58 | -0.1620 | 0.0148 | 5.5x10 <sup>-28</sup> |
| rs6795970 | 3p22.2   | <i>SCN10A</i> | Missense | A             | 0.10 | 0.1834  | 0.0249 | 1.8x10 <sup>-13</sup> |
| rs883079  | 12q24.21 | <i>TBX5</i>   | 3'UTR    | G             | 0.34 | 0.0878  | 0.0154 | 1.1x10 <sup>-8</sup>  |

\*Coding allele frequency

All three top SNPs were also significantly associated with PR interval for European ancestry

**Supplementary Table 7. Association with each top variant in individual studies.** Z-scores were listed. AA: African ancestry; EA: European ancestry.

| SNP         | AA: ARIC | AA: CHS | AA: JHS | AA: MESA | AA: WHI | EA: AGES | EA: ARIC | EA: BRIGHT | EA: CHS | EA: ERF | EA: FHS | EA: GOCHA | EA: GRAPHIC | EA: INTER99 | EA: KORA | EA: KORCULA | EA: Lifelines | EA: LRGP | EA: MESA | EA: CAMP | EA: NEO | EA: RS | EA: SCOTLAND | EA: SHIP | EA: TwinsUK | EA: WHI | EA: YFS |
|-------------|----------|---------|---------|----------|---------|----------|----------|------------|---------|---------|---------|-----------|-------------|-------------|----------|-------------|---------------|----------|----------|----------|---------|--------|--------------|----------|-------------|---------|---------|
| rs6795970   | 3.60     | 1.73    | 5.22    | 0.04     | 5.39    | 6.12     | 12.02    | 3.81       | 6.83    | 1.67    | 7.54    | 0.59      | 3.56        | 9.23        | 6.05     | -0.09       | 4.90          | 4.65     | 0.51     | 5.73     | 11.37   | 7.06   | 9.83         | 8.80     | 2.29        | 14.79   | 7.47    |
| rs3922844   | -7.11    | -2.89   | -7.76   | -0.26    | -5.10   | -2.33    | -5.94    | -3.18      | -3.49   | -2.06   | -5.86   | -2.19     | -1.47       | -4.86       | -1.15    | -3.10       | -3.38         | -1.70    | 0.80     | NA       | -4.90   | -3.55  | -7.35        | -6.08    | -2.59       | -8.07   | -2.84   |
| rs3807989   | 2.03     | 2.32    | 1.09    | 0.85     | 3.49    | 4.69     | 7.47     | 1.53       | 3.60    | 1.76    | 5.43    | 0.19      | 2.50        | 4.75        | 3.03     | 0.90        | 1.52          | 3.50     | -0.08    | 3.04     | 5.65    | 3.73   | 7.05         | 6.29     | -0.17       | 6.15    | 3.06    |
| rs7660702   | -2.91    | -0.08   | -1.39   | -0.51    | -1.83   | -3.05    | -4.74    | 0.30       | -3.67   | -2.33   | -4.76   | 0.63      | -3.61       | -5.91       | -4.59    | 0.31        | -3.56         | -1.63    | 0.51     | -3.05    | -5.08   | -3.66  | -5.23        | -6.79    | -1.70       | -8.79   | -1.74   |
| rs17287293  | -0.24    | -4.33   | -0.01   | 0.71     | -0.55   | -3.04    | -5.91    | -2.06      | -3.36   | -2.50   | -4.33   | -1.06     | -1.14       | -3.50       | -3.79    | 0.51        | -0.63         | -4.78    | 1.19     | -1.81    | -3.69   | -0.90  | -5.11        | -4.34    | -1.67       | -8.56   | -4.71   |
| rs11897119  | 2.85     | -0.20   | 2.95    | 0.93     | NA      | 1.53     | 3.22     | 0.98       | 2.47    | 1.96    | 2.71    | 0.97      | 2.31        | 3.93        | 4.01     | -1.17       | 2.64          | 0.82     | -1.34    | 1.69     | 3.22    | 2.93   | 4.88         | 1.98     | 0.03        | NA      | 0.03    |
| rs1896312   | 2.08     | 1.36    | 1.08    | 0.36     | -0.62   | 1.74     | 4.20     | 1.68       | 1.38    | 1.31    | 3.44    | -0.33     | 2.27        | 3.22        | 2.49     | 0.29        | 1.11          | 3.00     | -0.34    | NA       | 2.24    | 3.22   | 2.72         | 3.36     | 2.18        | 3.93    | 2.18    |
| rs883079    | 3.32     | 3.06    | 3.09    | 0.40     | 3.00    | 1.31     | 3.38     | -0.26      | 2.52    | 0.47    | 1.85    | 1.60      | 1.46        | 2.74        | 0.51     | -0.20       | 0.85          | 0.89     | -1.38    | NA       | 1.02    | 0.23   | 3.58         | 2.17     | 0.09        | 7.45    | 0.25    |
| rs116202356 | -0.60    | -0.10   | -1.49   | -2.10    | -0.69   | -1.38    | -4.02    | 1.21       | -1.78   | -1.23   | -2.08   | -2.02     | -2.06       | -3.15       | -2.10    | -0.66       | -1.27         | -1.76    | 0.74     | -3.20    | -3.15   | -3.02  | -1.71        | -2.23    | 0.12        | -5.00   | -0.63   |
| rs251253    | 0.62     | -1.63   | -1.92   | 0.28     | -0.49   | -0.68    | -4.06    | -0.97      | -2.27   | -0.86   | -4.32   | 0.85      | -1.60       | -4.88       | -1.93    | -0.45       | -3.17         | -1.02    | 0.29     | NA       | -2.59   | -1.73  | -2.88        | -2.06    | -1.07       | -2.22   | -1.30   |
| rs11153730  | -1.83    | -1.90   | -1.31   | -0.43    | -0.24   | -3.14    | -2.00    | -1.92      | -0.82   | -1.44   | -0.74   | 0.36      | -2.48       | -2.08       | -2.01    | 1.08        | -1.41         | 0.77     | 0.18     | -3.66    | -3.94   | -1.46  | -1.60        | -2.15    | -1.41       | -3.92   | -1.17   |
| rs35658696  | 1.69     | -0.69   | 1.04    | 1.14     | 1.52    | 0.51     | 2.68     | 0.64       | 2.21    | 3.24    | 1.21    | 1.41      | -0.32       | 2.68        | 0.87     | -2.29       | 0.00          | -0.56    | -0.29    | 0.22     | 1.98    | 1.01   | 3.62         | 2.35     | 2.29        | 4.11    | 2.36    |
| rs2070492   | 2.08     | -0.23   | 0.44    | -0.95    | 0.46    | 0.44     | 1.22     | -0.20      | 2.71    | -1.38   | 1.07    | 0.79      | 1.53        | 2.05        | 2.36     | 1.95        | 3.09          | 2.27     | -1.35    | 0.36     | 3.02    | 2.03   | 2.54         | 1.64     | 2.70        | 4.50    | -0.51   |
| rs2585897   | 2.48     | 2.13    | 1.34    | -0.44    | -0.48   | 0.20     | 4.59     | 1.38       | 1.55    | 0.41    | 0.89    | 1.58      | -0.33       | 2.54        | 1.02     | 0.80        | 1.12          | 1.74     | 0.65     | 1.92     | 1.22    | 0.89   | 1.74         | 1.03     | 2.23        | 1.92    | 2.50    |
| rs2042995   | 1.57     | 1.47    | 3.04    | -0.93    | 1.52    | 1.58     | 3.39     | -0.28      | 2.13    | 0.95    | 1.00    | 0.01      | 1.31        | 1.83        | 0.89     | 0.28        | 2.27          | 1.18     | 0.06     | -0.72    | 1.35    | 0.26   | 2.04         | 1.83     | -0.53       | 1.82    | 1.32    |
| rs4399693   | -0.78    | 0.68    | -2.08   | 0.14     | NA      | 1.10     | 4.18     | -0.24      | 1.64    | 0.61    | 1.76    | 1.10      | 1.78        | 2.47        | 1.79     | 1.05        | 1.52          | 1.59     | -0.70    | 1.94     | 2.48    | 0.71   | 2.97         | 1.91     | 0.35        | NA      | 0.23    |
| rs41306688  | 0.79     | NA      | -0.21   | -0.75    | -0.66   | 2.93     | 3.79     | 1.53       | NA      | 0.52    | 0.39    | 0.13      | 0.62        | NA          | 1.47     | 1.08        | 1.48          | 0.69     | -1.16    | 1.50     | NA      | 2.10   | 1.93         | 1.31     | 2.04        | NA      | 1.14    |
| rs4745      | 0.06     | 1.25    | 0.71    | 0.40     | 0.38    | 1.49     | 3.32     | -0.14      | 0.69    | -0.62   | 1.82    | -0.74     | 2.95        | 1.47        | 0.93     | -0.06       | 2.49          | -0.24    | 0.20     | 0.38     | NA      | -1.86  | 1.64         | 2.37     | 2.75        | 3.33    | 0.49    |
| rs11078078  | 0.12     | -0.15   | 1.44    | 0.68     | 2.84    | 2.92     | 0.97     | 1.53       | 0.76    | 1.59    | 1.53    | -0.03     | 0.02        | 1.49        | 1.80     | 0.43        | -0.65         | -1.22    | -0.37    | 0.90     | 1.90    | 0.87   | 1.52         | 2.55     | 3.20        | 1.86    | 1.82    |

|            |       |       |       |       |       |       |       |       |       |       |       |       |       |       |       |       |       |       |       |       |       |       |       |       |       |       |       |
|------------|-------|-------|-------|-------|-------|-------|-------|-------|-------|-------|-------|-------|-------|-------|-------|-------|-------|-------|-------|-------|-------|-------|-------|-------|-------|-------|-------|
| rs60632610 | -0.53 | -1.70 | -0.46 | -0.91 | 0.46  | -0.43 | -1.28 | -0.09 | -0.85 | -0.93 | -0.23 | 0.91  | -1.57 | -0.81 | 0.15  | 0.59  | -0.94 | -1.72 | -1.05 | -1.92 | -1.65 | -2.52 | -1.44 | -1.14 | -0.15 | -3.39 | -1.09 |
| rs11848785 | 1.67  | -0.25 | 1.14  | 0.20  | 0.68  | 0.33  | 3.52  | -0.29 | -0.40 | 0.01  | 1.39  | -1.13 | 1.94  | 2.11  | 1.22  | 0.28  | 0.50  | 2.15  | 0.91  | 0.21  | 1.57  | 2.54  | 1.25  | -0.19 | -0.13 | 2.08  | 1.31  |
| rs3733414  | 0.71  | -0.22 | 0.51  | -0.35 | 3.69  | 1.05  | 0.66  | 0.83  | 1.06  | 1.83  | 1.45  | 1.45  | 1.46  | 1.87  | -0.72 | 1.24  | 0.09  | 1.03  | 0.62  | 0.99  | 1.32  | 0.87  | 1.97  | 1.82  | 0.94  | 2.15  | 1.21  |
| rs17362588 | -1.78 | 0.82  | -1.84 | 0.34  | -0.88 | -2.71 | -0.73 | 1.02  | -0.34 | -2.80 | -1.35 | 0.74  | -1.19 | -1.60 | -0.59 | 1.48  | 0.32  | -0.64 | -0.96 | -0.55 | -1.28 | 0.90  | -1.73 | -2.18 | -0.48 | -3.40 | -2.23 |
| rs2296172  | 1.44  | 1.45  | -0.07 | -0.08 | -0.74 | 0.74  | 1.38  | 1.50  | 0.92  | 2.11  | -0.93 | 0.14  | -0.58 | 2.54  | 0.79  | 0.82  | 0.20  | 1.89  | 1.39  | 2.34  | 0.85  | 1.35  | 2.19  | 1.88  | -0.49 | 0.85  | 0.92  |
| rs9398652  | 1.62  | 0.48  | -0.60 | 0.43  | 0.09  | 0.94  | 1.74  | -0.23 | 1.66  | -0.08 | 0.75  | 1.21  | 0.58  | 1.93  | 2.17  | 0.87  | -0.01 | 0.90  | 1.48  | NA    | 2.11  | -0.50 | 1.51  | -0.10 | 1.90  | 3.47  | 0.95  |
| rs442177   | 0.84  | -0.97 | -0.56 | 0.32  | -1.20 | -0.32 | -3.98 | -0.77 | -0.16 | -1.27 | -0.41 | 0.32  | -1.33 | -2.05 | -2.40 | 0.60  | -0.34 | 0.33  | -1.21 | NA    | -1.24 | 0.17  | -1.32 | -0.52 | -0.93 | -2.73 | -0.31 |
| rs7002002  | 0.20  | NA    | -0.93 | -1.79 | -1.23 | -0.91 | -1.92 | -1.66 | NA    | -1.27 | 0.43  | -1.86 | -0.36 | -4.32 | -1.16 | -0.06 | 0.09  | -0.19 | -1.42 | 0.37  | -0.93 | 0.33  | -2.07 | -0.71 | -0.53 | -1.68 | -0.41 |
| rs1768208  | 2.08  | -1.59 | 0.97  | -0.65 | 0.15  | 1.14  | 1.84  | 0.53  | 1.62  | 0.25  | 1.04  | -0.22 | 1.26  | 2.72  | 1.11  | 0.67  | 1.23  | -0.94 | -0.77 | 0.28  | 1.68  | 1.88  | 0.32  | 2.08  | -0.18 | 2.09  | 1.31  |
| rs2119788  | 2.29  | -1.35 | 0.44  | -1.47 | -0.60 | -1.12 | -1.38 | -1.65 | -1.68 | -0.23 | -1.33 | 1.04  | -0.34 | -0.56 | -0.32 | 0.65  | -2.08 | -0.51 | -0.45 | -0.68 | -2.40 | -0.05 | -3.97 | -1.41 | 0.34  | -1.73 | -1.77 |
| rs17391905 | -1.96 | -1.01 | 0.26  | -1.11 | 0.06  | -2.88 | -3.15 | -0.52 | -0.65 | 1.56  | -0.24 | -0.49 | 0.16  | -2.37 | -0.64 | -0.01 | -0.09 | -0.10 | -0.27 | -1.82 | -0.02 | -1.61 | -1.57 | -0.60 | 0.48  | -1.89 | -0.20 |
| rs524295   | 1.90  | -0.23 | 0.58  | -0.58 | -0.66 | -1.15 | -3.36 | -0.83 | -1.23 | -0.63 | -0.16 | -1.29 | -0.15 | 0.01  | -2.50 | -0.05 | -0.68 | -0.79 | -0.33 | NA    | -2.30 | -0.22 | -1.77 | -0.78 | -0.78 | -1.89 | -0.97 |

**Supplementary Table 8. Association with rare variants in *MYH6* with PR interval**

| Marker name | dbSNP ID    | Chr | Position | Coding allele | Non-coding allele | Coding allele frequency | Beta   | SE    | P-value  | Function      |
|-------------|-------------|-----|----------|---------------|-------------------|-------------------------|--------|-------|----------|---------------|
| exm1090339  | rs201199853 | 14  | 23851739 | C             | G                 | 5.75E-05                | -0.340 | 0.326 | 2.97E-01 | Missense      |
| exm1090343  | rs201919534 | 14  | 23852468 | C             | T                 | 7.44E-05                | -0.536 | 0.315 | 8.90E-02 | Missense      |
| exm1090381  | rs151324358 | 14  | 23854213 | A             | G                 | 9.16E-05                | 0.835  | 0.243 | 5.92E-04 | Missense      |
| exm1090429  | rs34330111  | 14  | 23856793 | A             | C                 | 2.05E-04                | 0.294  | 0.162 | 7.03E-02 | Missense      |
| exm1090430  | rs201827489 | 14  | 23856794 | A             | G                 | 4.31E-05                | 0.479  | 0.379 | 2.07E-01 | Missense      |
| exm1090436  | rs199936506 | 14  | 23856987 | T             | C                 | 1.72E-04                | 0.331  | 0.209 | 1.13E-01 | Missense      |
| exm1809071  | rs201016285 | 14  | 23857430 | T             | C                 | 1.08E-05                | 0.642  | 0.707 | 3.64E-01 | Missense      |
| exm1090461  | rs150815925 | 14  | 23857530 | T             | C                 | 6.77E-04                | -0.071 | 0.095 | 4.57E-01 | Missense      |
| exm1090474  | rs145611185 | 14  | 23858107 | A             | G                 | 3.77E-04                | 0.359  | 0.121 | 2.93E-03 | Missense      |
| exm1090522  | rs145508517 | 14  | 23862173 | C             | T                 | 8.08E-05                | 0.174  | 0.257 | 4.97E-01 | Missense      |
| exm1090530  | rs143978652 | 14  | 23862646 | A             | C                 | 1.05E-03                | -0.120 | 0.078 | 1.22E-01 | Missense      |
| exm1090537  | rs144907522 | 14  | 23862913 | A             | C                 | 4.85E-04                | 0.179  | 0.106 | 8.99E-02 | Missense      |
| exm1090541  | rs199838024 | 14  | 23862996 | A             | G                 | 1.40E-04                | 0.529  | 0.205 | 9.72E-03 | Missense      |
| exm1090542  | rs141704264 | 14  | 23862997 | A             | C                 | 2.85E-03                | 0.110  | 0.044 | 1.32E-02 | Missense      |
| exm1090555  | rs201193346 | 14  | 23863348 | A             | G                 | 4.69E-04                | 0.002  | 0.116 | 9.87E-01 | Missense      |
| exm1090559  | rs143284278 | 14  | 23863362 | C             | T                 | 3.26E-05                | -0.088 | 0.408 | 8.30E-01 | Missense      |
| exm1090560  | rs115845031 | 14  | 23863383 | T             | C                 | 2.11E-03                | -0.014 | 0.051 | 7.89E-01 | Missense      |
| exm1090567  | rs202120238 | 14  | 23865539 | A             | G                 | 2.14E-04                | 0.245  | 0.178 | 1.69E-01 | Missense      |
| exm1090599  | rs142992009 | 14  | 23868065 | G             | T                 | 2.69E-03                | 0.357  | 0.046 | 1.03E-14 | Missense      |
| exm1090600  | rs150415679 | 14  | 23868075 | T             | C                 | 1.02E-04                | 0.098  | 0.249 | 6.94E-01 | Missense      |
| exm1090629  | rs200359124 | 14  | 23870067 | T             | C                 | 5.94E-05                | 0.169  | 0.302 | 5.76E-01 | Missense      |
| exm1090630  | rs147606900 | 14  | 23870076 | T             | C                 | 4.85E-05                | 0.073  | 0.333 | 8.27E-01 | Missense      |
| exm1090652  | rs138572790 | 14  | 23871807 | C             | G                 | 1.12E-04                | 0.018  | 0.277 | 9.48E-01 | Missense      |
| exm1090664  | rs140660481 | 14  | 23872624 | A             | C                 | 2.83E-04                | -0.229 | 0.163 | 1.61E-01 | Missense      |
| exm1090665  | rs201327273 | 14  | 23872631 | T             | A                 | 1.49E-04                | 0.347  | 0.236 | 1.41E-01 | Missense      |
| exm1090674  | NA          | 14  | 23873927 | A             | G                 | 4.40E-05                | 0.298  | 0.386 | 4.41E-01 | Missense      |
| exm1090675  | rs142027794 | 14  | 23873940 | T             | C                 | 6.74E-03                | -0.078 | 0.030 | 9.54E-03 | Missense      |
| exm1090676  | rs200623022 | 14  | 23873951 | T             | C                 | 2.16E-05                | -0.077 | 0.500 | 8.78E-01 | Missense      |
| exm1090695  | rs141187241 | 14  | 23874590 | C             | T                 | 3.77E-05                | -0.176 | 0.376 | 6.40E-01 | Splicing site |
| exm1090701  | rs140596256 | 14  | 23874889 | T             | C                 | 5.34E-04                | 0.393  | 0.112 | 4.46E-04 | Missense      |
| exm1090710  | rs142850511 | 14  | 23876318 | T             | C                 | 1.29E-04                | 0.475  | 0.242 | 4.98E-02 | Missense      |
| exm1090712  | rs150574114 | 14  | 23876347 | T             | C                 | 1.45E-03                | 0.156  | 0.061 | 1.06E-02 | Missense      |



**Supplementary Table 9. Association with rare variants in *SCN5A* with PR interval**

| Marker name | dbSNP ID    | Chr | Position | Coding allele | Non-coding allele | Coding allele frequency | Beta   | SE    | P-value  | Function |
|-------------|-------------|-----|----------|---------------|-------------------|-------------------------|--------|-------|----------|----------|
| exm301106   | rs7626962   | 3   | 38620907 | T             | G                 | 8.30E-03                | -0.11  | 0.029 | 1.55E-04 | Missense |
| exm301170   | rs41313691  | 3   | 38645522 | T             | G                 | 3.86E-03                | -0.02  | 0.038 | 5.98E-01 | Missense |
| exm301004   | rs41311117  | 3   | 38591853 | G             | A                 | 3.69E-03                | 0.132  | 0.042 | 1.75E-03 | Missense |
| exm301003   | rs45489199  | 3   | 38591847 | C             | G                 | 1.75E-03                | -0.204 | 0.06  | 6.09E-04 | Missense |
| exm301177   | rs41313697  | 3   | 38646357 | C             | A                 | 1.29E-03                | -0.173 | 0.067 | 1.01E-02 | Missense |
| exm301174   | rs144511230 | 3   | 38646297 | A             | G                 | 1.14E-03                | -0.027 | 0.070 | 6.97E-01 | Missense |
| exm301095   | rs41261344  | 3   | 38616876 | T             | C                 | 1.11E-03                | 0.119  | 0.072 | 1.01E-01 | Missense |
| exm301214   | rs41276525  | 3   | 38655290 | A             | G                 | 8.84E-04                | 0.311  | 0.083 | 1.63E-04 | Missense |
| exm301213   | rs45620037  | 3   | 38655278 | A             | G                 | 7.87E-04                | 0.324  | 0.086 | 1.64E-04 | Missense |
| exm301155   | rs12720452  | 3   | 38645249 | T             | C                 | 6.95E-04                | 0.099  | 0.107 | 3.55E-01 | Missense |
| exm301154   | rs45488304  | 3   | 38645241 | A             | G                 | 6.61E-04                | -0.170 | 0.091 | 6.20E-02 | Missense |
| exm301081   | rs41313031  | 3   | 38603947 | A             | G                 | 6.45E-04                | 0.237  | 0.103 | 2.16E-02 | Missense |
| exm301039   | rs199473316 | 3   | 38592503 | T             | C                 | 5.44E-04                | 0.151  | 0.106 | 1.54E-01 | Missense |
| exm301082   | rs199473603 | 3   | 38603958 | A             | G                 | 4.85E-04                | 0.123  | 0.114 | 2.79E-01 | Missense |
| exm301207   | rs61746118  | 3   | 38651303 | A             | C                 | 3.77E-04                | -0.021 | 0.120 | 8.61E-01 | Missense |
| exm301149   | rs41313681  | 3   | 38640465 | A             | G                 | 3.45E-04                | -0.081 | 0.125 | 5.19E-01 | Missense |
| exm301085   | rs41311127  | 3   | 38603991 | G             | A                 | 3.13E-04                | 0.197  | 0.138 | 1.53E-01 | Missense |
| exm301108   | rs1805125   | 3   | 38620946 | A             | G                 | 3.09E-04                | -0.163 | 0.161 | 3.12E-01 | Missense |
| exm301030   | rs45563942  | 3   | 38592356 | G             | A                 | 2.21E-04                | -0.06  | 0.156 | 7.02E-01 | Missense |
| exm301203   | rs199473087 | 3   | 38651264 | T             | A                 | 2.07E-04                | -0.145 | 0.167 | 3.84E-01 | Missense |
| exm301090   | rs199473600 | 3   | 38607989 | T             | C                 | 1.51E-04                | -0.15  | 0.189 | 4.26E-01 | Missense |
| exm2050823  | rs192113333 | 3   | 38662392 | T             | C                 | 1.40E-04                | 0.017  | 0.215 | 9.37E-01 | Missense |
| exm301143   | rs199473140 | 3   | 38640418 | T             | C                 | 1.35E-04                | 0.279  | 0.305 | 3.60E-01 | Missense |
| exm301022   | rs150264233 | 3   | 38592152 | A             | G                 | 1.19E-04                | 0.401  | 0.218 | 6.54E-02 | Missense |
| exm301061   | rs199473618 | 3   | 38595989 | T             | C                 | 1.19E-04                | -0.692 | 0.215 | 1.27E-03 | Missense |
| exm301152   | rs199473577 | 3   | 38645235 | A             | G                 | 1.17E-04                | 0.002  | 0.402 | 9.96E-01 | Missense |
| exm301107   | rs199473192 | 3   | 38620916 | A             | G                 | 1.13E-04                | -0.216 | 0.454 | 6.34E-01 | Missense |
| exm301026   | rs45465995  | 3   | 38592174 | A             | G                 | 1.04E-04                | 0.095  | 0.250 | 7.05E-01 | Missense |
| exm301223   | rs201232332 | 3   | 38662449 | T             | C                 | 9.17E-05                | 0.127  | 0.243 | 6.02E-01 | Missense |
| exm301220   | rs201002736 | 3   | 38655522 | A             | G                 | 8.08E-05                | 0.175  | 0.267 | 5.13E-01 | Missense |
| exm301183   | rs199473111 | 3   | 38647498 | T             | C                 | 3.77E-05                | -0.205 | 0.389 | 5.98E-01 | Missense |
| exm301141   | rs199473146 | 3   | 38639411 | T             | C                 | 2.69E-05                | 0.631  | 0.447 | 1.58E-01 | Missense |
| exm301232   | rs202114798 | 3   | 38671914 | C             | T                 | 2.16E-05                | 0.552  | 0.563 | 3.27E-01 | Missense |
| exm2239463  | rs199473061 | 3   | 38663937 | T             | C                 | 1.18E-05                | 0.095  | 0.709 | 8.94E-01 | Missense |
| exm2050754  | rs192379242 | 3   | 38616877 | A             | G                 | 1.08E-05                | 0.280  | 0.709 | 6.92E-01 | Missense |

**Supplementary Table 10. Top gene regions associated with PR interval by the SKAT test that included only damaging variants**

| Gene           | P value        | Qmeta           | CMAF*         | #Variants |
|----------------|----------------|-----------------|---------------|-----------|
| <b>GORASP1</b> | <b>1.1E-05</b> | <b>14066507</b> | <b>0.0262</b> | <b>11</b> |
| <b>NEBL</b>    | <b>1.9E-05</b> | <b>10818563</b> | <b>0.0237</b> | <b>22</b> |
| <b>SCN5A</b>   | <b>2.2E-05</b> | <b>10335754</b> | <b>0.0184</b> | <b>22</b> |
| PLEC           | 1.9E-04        | 9000047         | 0.0283        | 70        |
| CD36           | 2.8E-04        | 7951469         | 0.0132        | 22        |
| MTRF1          | 2.9E-04        | 7671348         | 0.0150        | 8         |
| TTN            | 7.8E-04        | 51687919        | 0.3652        | 435       |
| PRKDC          | 1.1E-03        | 3978379         | 0.0115        | 22        |
| SDR42E1        | 1.1E-03        | 5721052         | 0.0125        | 16        |
| AFP            | 1.1E-03        | 7479080         | 0.0175        | 10        |

\*CMAF: Cumulative minor allele frequency

The significance level threshold for gene-based tests after Bonferroni correction was  $P < 0.05/2030 = 2.5 \times 10^{-5}$ . The three genes that reached this significance cutoff were highlighted by bold.

**Supplementary Table 11. Association of PR-related SNPs with gene expression in the heart and vascular tissues from GTEx database<sup>148</sup>**

| PR-related SNP <sup>+</sup> | eSNP <sup>*</sup> | r <sup>2</sup> | eGene <sup>§</sup>  | P-value <sup>&amp;</sup> | Tissue                 |
|-----------------------------|-------------------|----------------|---------------------|--------------------------|------------------------|
| rs11153730                  | rs56399949        | 0.84           | <i>SSXP10</i>       | 1.3E-07                  | Artery Aorta           |
| rs11153730                  | rs78757409        | 0.84           | <i>SSXP10</i>       | 3.5E-07                  | Heart Atrial Appendage |
| rs1768208                   | rs1768208         | 1.00           | <i>RPSA</i>         | 2.1E-07                  | Heart Atrial Appendage |
| rs1768208                   | rs1768234         | 0.80           | <i>RPSA</i>         | 6.1E-07                  | Artery Aorta           |
| rs2042995                   | rs6723399         | 0.63           | <i>FKBP7</i>        | 9.1E-11                  | Artery Aorta           |
| rs2296172                   | rs61779310        | 0.74           | <i>OXCT2P1</i>      | 1.7E-10                  | Artery Aorta           |
| rs2296172                   | rs1775654         | 0.61           | <i>RP11-69E11.4</i> | 5.6E-08                  | Artery Aorta           |
| rs2296172                   | rs4617393         | 0.61           | <i>RP11-69E11.4</i> | 1.8E-07                  | Heart Left Ventricle   |
| rs2296172                   | rs61779277        | 1.00           | <i>PABPC4</i>       | 2.2E-06                  | Artery Aorta           |
| rs2296172                   | rs613511          | 0.62           | <i>BMP8A</i>        | 2.9E-06                  | Heart Atrial Appendage |
| rs2296172                   | rs61779314        | 0.52           | <i>OXCT2</i>        | 4.4E-06                  | Artery Aorta           |
| rs2296172                   | rs17264866        | 0.59           | <i>BMP8A</i>        | 5.3E-06                  | Heart Left Ventricle   |
| rs2296172                   | rs598415          | 0.62           | <i>OXCT2P1</i>      | 6.4E-06                  | Heart Atrial Appendage |
| rs4745                      | rs370545          | 0.57           | <i>GBAP1</i>        | 3.0E-28                  | Artery Aorta           |
| rs4745                      | rs2066981         | 0.56           | <i>GBAP1</i>        | 4.1E-20                  | Heart Left Ventricle   |
| rs4745                      | rs914615          | 0.57           | <i>GBAP1</i>        | 3.3E-10                  | Heart Atrial Appendage |
| rs4745                      | rs370545          | 0.57           | <i>GBAP1</i>        | 1.6E-07                  | Artery Coronary        |
| rs60632610                  | rs60632610        | 1.00           | <i>MYOZ1</i>        | 4.7E-23                  | Heart Atrial Appendage |
| rs7002002                   | rs11777239        | 0.86           | <i>PLEC</i>         | 1.8E-13                  | Artery Aorta           |
| rs7002002                   | rs12543539        | 0.88           | <i>PLEC</i>         | 5.1E-06                  | Heart Atrial Appendage |
| rs883079                    | rs2891503         | 0.73           | <i>TBX5</i>         | 3.8E-06                  | Heart Left Ventricle   |

<sup>+</sup> Each variant listed is the top SNP associated with PR-interval at the indicated locus (from Table 2).

<sup>\*</sup> The most significant eSNP at the locus, which is in LD with PR-related SNP ( $r^2 \geq 0.5$ )

<sup>§</sup> The most significant eGene at the locus

<sup>&</sup> For the association between the eSNP and the eGene from GTEx with FDR<0.05

**Supplementary Table 12. Most significantly enriched biological pathways**

| Database   | Get set                                             | Original get set size | Effective gene set size | Expected number of genes above 95% cutoff | Observed number of genes above 95% cutoff | Nominal <i>P</i> -value | FDR   |
|------------|-----------------------------------------------------|-----------------------|-------------------------|-------------------------------------------|-------------------------------------------|-------------------------|-------|
| GO Process | Heart morphogenesis                                 | 124                   | 69                      | 3                                         | 13                                        | 3.6E-05                 | 0.049 |
| GO Process | Regulation of microtubule cytoskeleton organization | 52                    | 32                      | 2                                         | 7                                         | 1.0E-03                 | 0.082 |
| GO Process | Vesicle coating                                     | 25                    | 13                      | 1                                         | 4                                         | 2.9E-03                 | 0.085 |
| REACTOME   | Phospholipase C mediated cascade                    | 23                    | 11                      | 1                                         | 4                                         | 1.6E-03                 | 0.089 |
| GO Process | Actomyosin structure organization                   | 32                    | 20                      | 1                                         | 5                                         | 2.0E-03                 | 0.092 |
| GO Process | Regulation of heart contraction                     | 83                    | 54                      | 3                                         | 9                                         | 1.1E-03                 | 0.094 |
| GO Process | Myofibril assembly                                  | 26                    | 17                      | 1                                         | 5                                         | 1.4E-03                 | 0.095 |
| GO Process | Ventricular septum development                      | 23                    | 12                      | 1                                         | 4                                         | 2.5E-03                 | 0.096 |

**Supplementary Table 13. Percentile of expression compared to all other genes in the same tissue in the GTEx database<sup>148</sup>.**

| <b>Gene</b>      | <b>Heart - Atrial Appendage</b> | <b>Heart - Left Ventricle</b> |
|------------------|---------------------------------|-------------------------------|
| <i>ADPRHL1</i>   | 99%                             | 99%                           |
| <i>AFF1</i>      | 93%                             | 92%                           |
| <i>ALDH18A1</i>  | 89%                             | 89%                           |
| <i>ARHGAP24</i>  | 84%                             | 85%                           |
| <i>C1orf185</i>  | 23%                             | 26%                           |
| <i>CAV1</i>      | 99%                             | 99%                           |
| <i>CCDC141</i>   | 84%                             | 86%                           |
| <i>CREBRF</i>    | 83%                             | 85%                           |
| <i>DLEC1</i>     | 60%                             | 58%                           |
| <i>EFNA1</i>     | 95%                             | 93%                           |
| <i>FAT1</i>      | 88%                             | 89%                           |
| <i>GJA1</i>      | 98%                             | 97%                           |
| <i>HAND2</i>     | 96%                             | 95%                           |
| <i>ID2</i>       | 99%                             | 99%                           |
| <i>LINC00477</i> | 21%                             | 23%                           |
| <i>LINC00670</i> | 56%                             | 52%                           |
| <i>MACF1</i>     | 93%                             | 92%                           |
| <i>MEIS1</i>     | 83%                             | 83%                           |
| <i>MOBP</i>      | 33%                             | 36%                           |
| <i>PAM</i>       | 100%                            | 99%                           |
| <i>PLEC</i>      | 96%                             | 95%                           |
| <i>SCN10A</i>    | 38%                             | 42%                           |
| <i>SCN5A</i>     | 96%                             | 97%                           |
| <i>SIPA1L1</i>   | 75%                             | 77%                           |
| <i>SLC22A14</i>  | 43%                             | 50%                           |
| <i>SLC35F1</i>   | 73%                             | 75%                           |
| <i>SYNPO2L</i>   | 99%                             | 99%                           |
| <i>TBX3</i>      | 85%                             | 86%                           |
| <i>TBX5</i>      | 98%                             | 99%                           |
| <i>TTN</i>       | 98%                             | 98%                           |
| <i>XPO4</i>      | 80%                             | 79%                           |

**Supplementary Figure 1. Overlap between PR loci with loci associated with AF or P-wave Indices (PWI).** “PR loci” represents the top loci from the current study. “AF loci” are the top loci that were recently reported from a large-scale GWAS study of AF (*Nat Genet, in press*). “PWI loci” are the top loci that were recently reported from a large-scale GWAS study of PWI (manuscript under review).

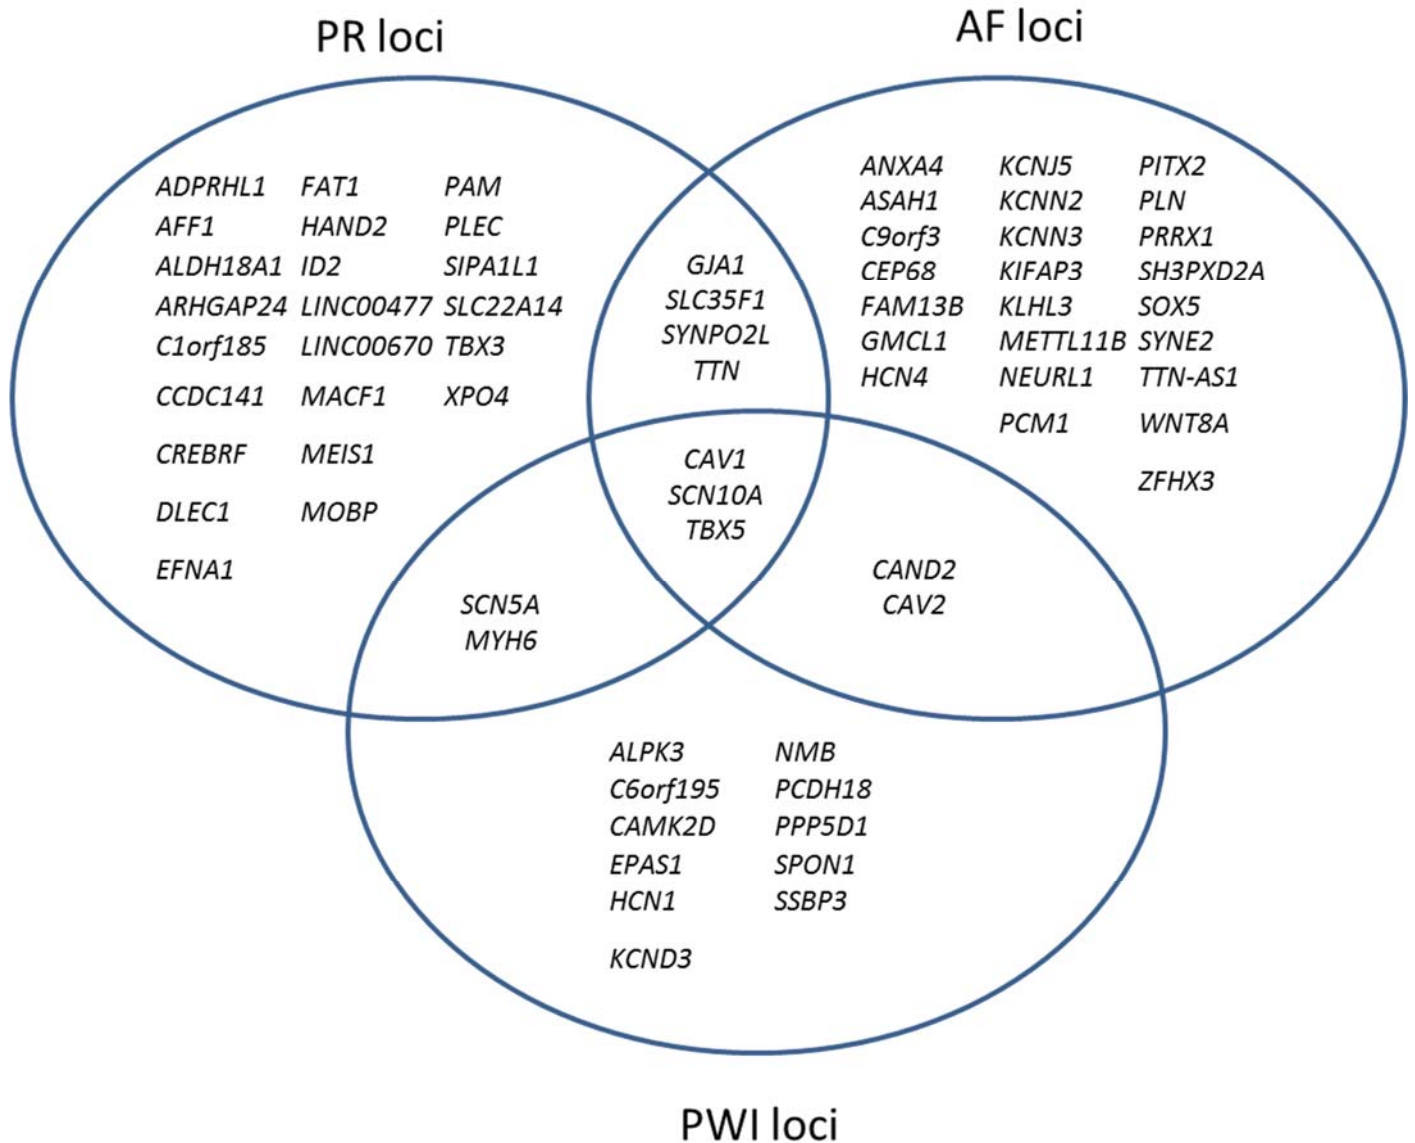

**Supplementary Figure 2. Manhattan plot for samples of European ancestry.** The x-axis represents the chromosomal position for each SNP, and the y-axis represents the  $-\log_{10}(P\text{-value})$  of the association with PR interval. The dashed line represents the genome-wide significance cutoff of  $5 \times 10^{-8}$ , and the blue line represents the Bonferroni  $P$ -value cutoff of  $1.3 \times 10^{-6}$ .

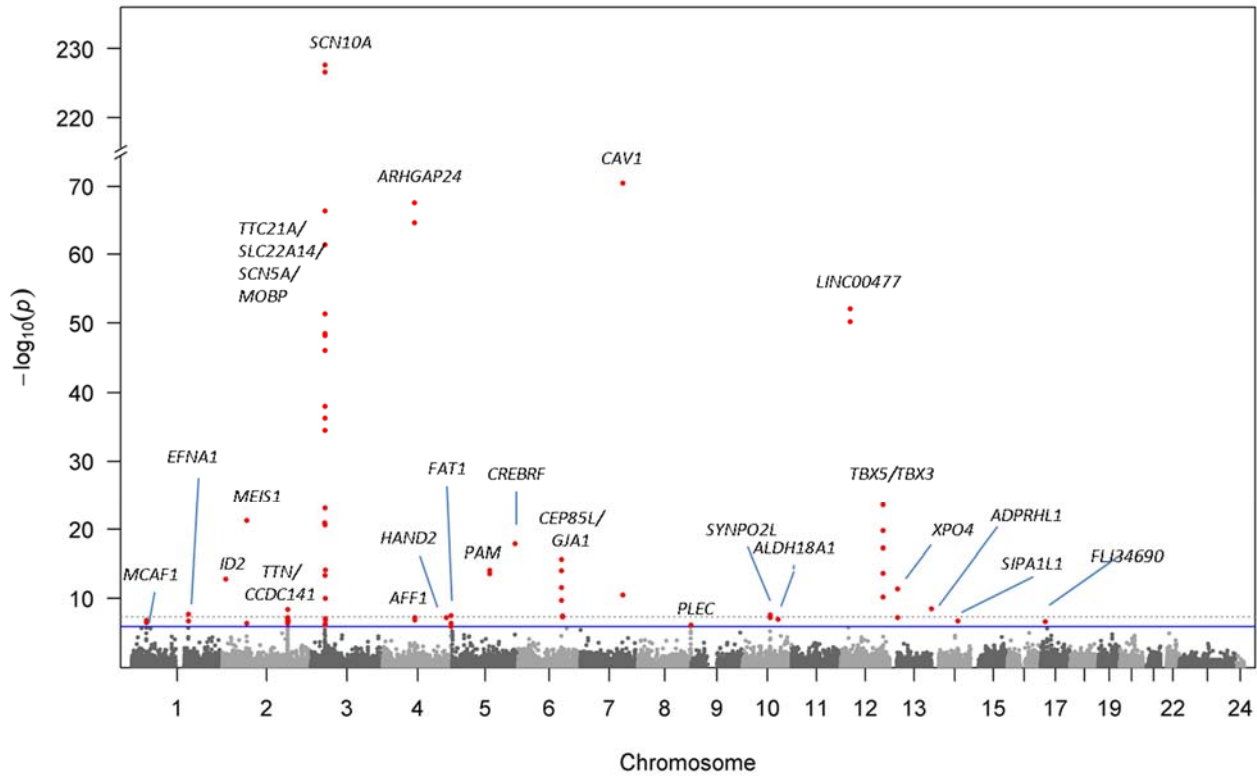

**Supplementary Figure 3. Manhattan plot for samples of African ancestry.** The x-axis represents the chromosomal position for each SNP, and the y-axis represents the  $-\log_{10}(P\text{-value})$  of the association with PR interval. The dashed line represents the genome-wide significance cutoff of  $5 \times 10^{-8}$ , and blue line represents the Bonferroni  $P$ -value cutoff of  $1.3 \times 10^{-6}$ .

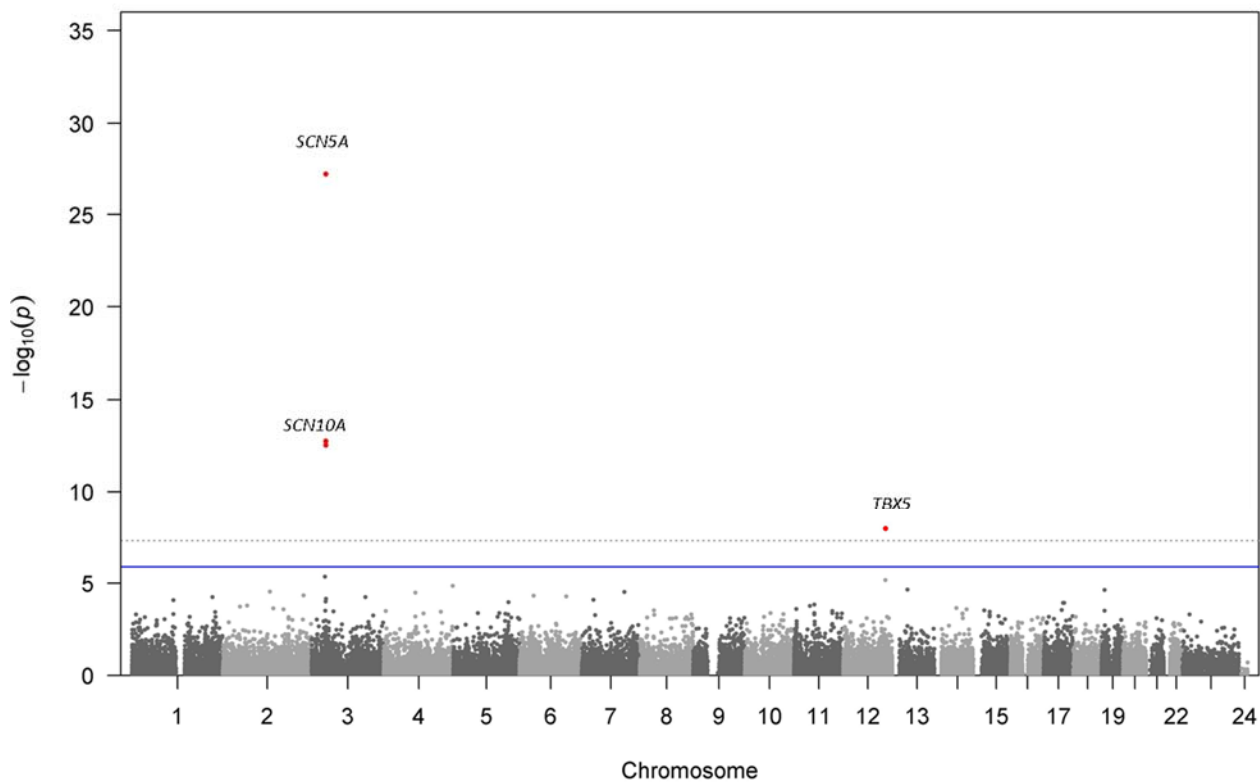



**Supplementary Figure 4. Enrichment of PR-related variants in regulatory regions.** For comparison, 1000 random variant sets were generated, each with MAF values and LD structures similar to those seen for PR-related variants. Red diamonds indicate scores for enrichment of PR variants in the selected regions, significant after Bonferroni correction ( $P_{adj} < 0.05$ ). Black diamonds indicate non-significant enrichment scores. The PR-related variants were enriched in evolutionarily conserved regions and cardiac-specific regulatory regions, but not in general regulatory regions.

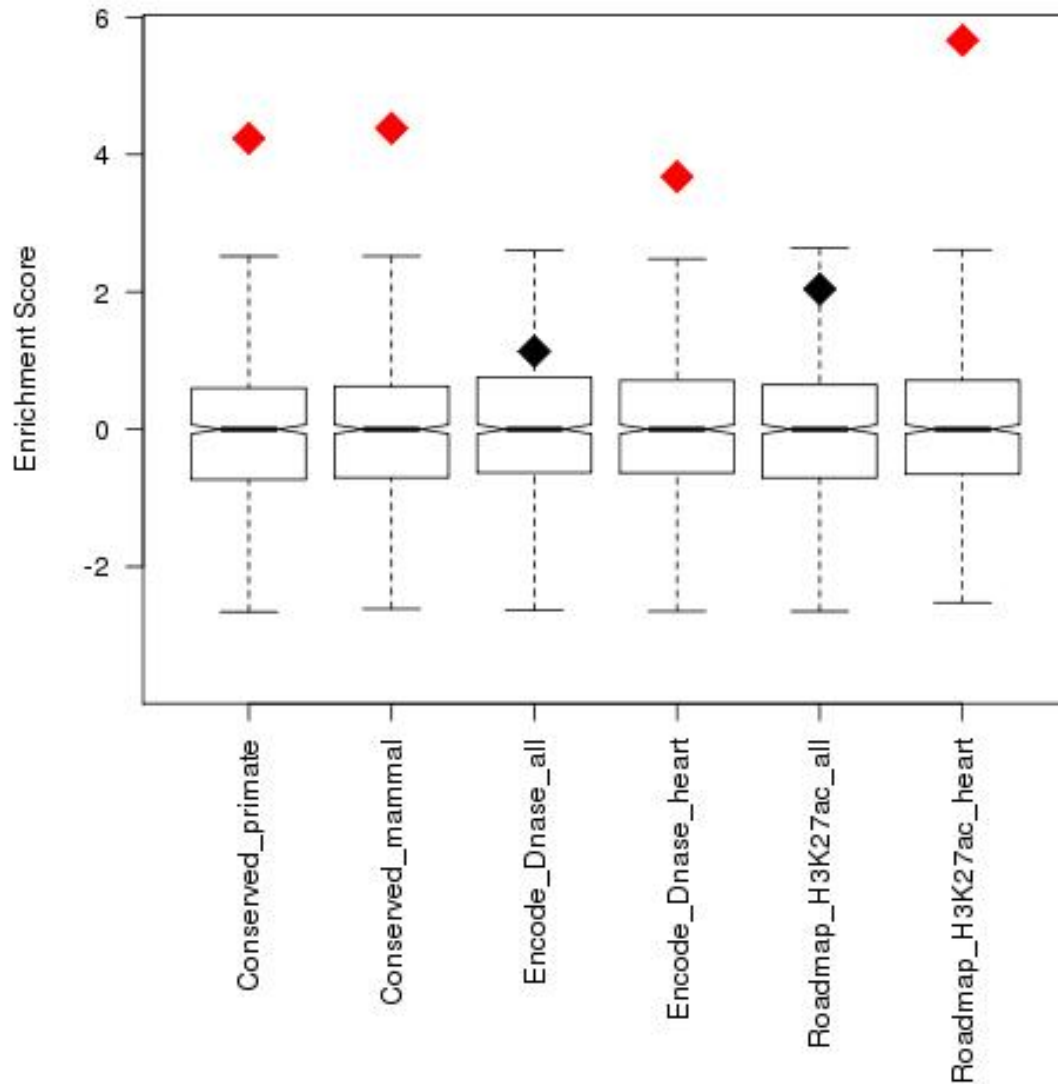

**Conserved\_primate:** phastCons 46-way primate conserved elements;  
**Conserved\_mammal:** phastCons 46-way mammalian conserved elements;  
**Encode\_Dnase\_all:** ENCODE DNaseHS master sites (125 cell types);  
**Encode\_Dnase\_heart:** ENCODE DNaseHS cardiac sites (cardiac fibroblasts, atrial fibroblasts, cardiac myocytes)  
**Roadmap\_H3K27ac\_all:** Any Roadmap Epigenome H3K27ac gapped peak (98 cell types);  
**Roadmap\_H3K27ac\_heart:** Any Roadmap Epigenome H3K27ac gapped peak (aorta, right atrium, left ventricle, right ventricle)

## Cohort Specific Acknowledgments

The **Atherosclerosis Risk in Communities (ARIC) study** is carried out as a collaborative study supported by the National Heart, Lung, and Blood Institute (NHLBI) contracts (HHSN268201100005C, HHSN268201100006C, HHSN268201100007C, HHSN268201100008C, HHSN268201100009C, HHSN268201100010C, HHSN268201100011C, and HHSN268201100012C). The authors thank the staff and participants of the ARIC study for their important contributions. Funding support for “Building on GWAS for NHLBI-diseases: the U.S. CHARGE consortium” was provided by the NIH through the American Recovery and Reinvestment Act of 2009 (ARRA) (5RC2HL102419).

The **Cardiovascular Health Study (CHS)** was supported by NHLBI contracts HHSN268201200036C, HHSN268200800007C, N01HC55222, N01HC85079, N01HC85080, N01HC85081, N01HC85082, N01HC85083, N01HC85086; and NHLBI grants U01HL080295, R01HL068986, R01HL087652, R01HL105756, R01HL103612, R01HL120393, and R01HL130114 with additional contribution from the National Institute of Neurological Disorders and Stroke (NINDS). Additional support was provided through R01AG023629 from the National Institute on Aging (NIA). A full list of principal CHS investigators and institutions can be found at [CHS-NHLBI.org](http://CHS-NHLBI.org). The provision of genotyping data was supported in part by the National Center for Advancing Translational Sciences, CTSI grant UL1TR001881, and the National Institute of Diabetes and Digestive and Kidney Disease Diabetes Research Center (DRC) grant DK063491 to the Southern California Diabetes Endocrinology Research Center. The content is solely the responsibility of the authors and does not necessarily represent the official views of the National Institutes of Health.

The **BRIGHT study** is extremely grateful to all the patients who participated in the study and the BRIGHT nursing team. This work was supported by the Medical Research Council of Great Britain (Grant Number G9521010D); and by the British Heart Foundation (Grant Number PG/02/128). A.F.D. was supported by the British Heart Foundation (Grant Numbers RG/07/005/23633, SP/08/005/25115); and by the European Union Ingenious HyperCare Consortium: Integrated Genomics, Clinical Research, and Care in Hypertension (grant number LSHM-C7-2006-037093). The Exome Chip genotyping was funded by Wellcome Trust Strategic Awards

(083948 and 085475). We would also like to thank the Barts Genome Centre staff for their assistance with this project. Drs. Munroe Warren wishes to acknowledge the NIHR Cardiovascular Biomedical Research Unit at Barts and The London, Queen Mary University of London, UK for support.

The **Framingham Heart Study** is supported by HHSN268201500001I and N01-HC 25195.

The **KORA** platform is funded by the German Ministry for Education and Research (BMBF) and by the State of Bavaria.

The **LifeLines Cohort Study**, and generation and management of GWAS genotype data for the LifeLines Cohort Study is supported by the Netherlands Organization of Scientific Research NWO (grant 175.010.2007.006), the Economic Structure Enhancing Fund (FES) of the Dutch government, the Ministry of Economic Affairs, the Ministry of Education, Culture and Science, the Ministry for Health, Welfare and Sports, the Northern Netherlands Collaboration of Provinces (SNN), the Province of Groningen, University Medical Center Groningen, the University of Groningen, Dutch Kidney Foundation and Dutch Diabetes Research Foundation.

The **Multi-Ethnic Study of Atherosclerosis (MESA)** is supported by contracts HHSN2682015000031, N01-HC-95159, N01-HC-95160, N01-HC-95161, N01-HC-95162, N01-HC-95163, N01-HC-95164, N01-HC-95165, N01-HC-95166, N01-HC-95167, N01-HC-95168, N01-HC-95169 and by grants UL1-TR-000040, UL1-TR-001079, UL1-TR-001420, and UL1-RR-025005 from NCRR. Funding for MESA SHARe genotyping was provided by NHLBI Contract N02-HL-6-4278. The provision of genotyping data was supported in part by the National Center for Advancing Translational Sciences, CTSI grant UL1TR001881, and the National Institute of Diabetes and Digestive and Kidney Disease Diabetes Research Center (DRC) grant DK063491 to the Southern California Diabetes Endocrinology Research Center.

The **TwinsUK study** was funded by the Wellcome Trust; European Community's Seventh Framework Programme (FP7/2007-2013). The study also receives support from the National Institute for Health Research (NIHR) BioResource Clinical Research Facility and Biomedical Research Centre based at Guy's and St Thomas' NHS Foundation Trust and King's College London. This work was funded by a grant from the British Heart Foundation (PG/12/38/29615).

The Novo Nordisk Foundation Center for Basic Metabolic Research is an independent Research Center at the University of Copenhagen partially funded by an unrestricted donation from the Novo Nordisk Foundation ([www.metabol.ku.dk](http://www.metabol.ku.dk)).

## References

1. Harris TB, Launer LJ, Eiriksdottir G, Kjartansson O, Jonsson PV, Sigurdsson G, et al. Age, gene/environment susceptibility-reykjavik study: Multidisciplinary applied phenomics. *Am J Epidemiol.* 2007;165:1076-1087.
2. Grove ML, Yu B, Cochran BJ, Haritunians T, Bis JC, Taylor KD, et al. Best practices and joint calling of the human exome beadchip: The charge consortium. *PLoS ONE.* 2013;8:e68095.
3. The atherosclerosis risk in communities (aric) study: Design and objectives. The aric investigators. *Am J Epidemiol.* 1989;129:687-702.
4. Caulfield M, Munroe P, Pembroke J, Samani N, Dominiczak A, Brown M, et al. Genome-wide mapping of human loci for essential hypertension. *Lancet.* 2003;361:2118-2123.
5. Walford GA, Colomo N, Todd JN, Billings LK, Fernandez M, Chamathi B, et al. The study to understand the genetics of the acute response to metformin and glipizide in humans (sugar-mgh): Design of a pharmacogenetic resource for type 2 diabetes. *PLoS ONE.* 2015;10:e0121553.
6. Fried LP, Borhani NO, Enright P, Furberg CD, Gardin JM, Kronmal RA, et al. The cardiovascular health study: Design and rationale. *Annals of epidemiology.* 1991;1:263-276.
7. Pardo LM, MacKay I, Oostra B, van Duijn CM, Aulchenko YS. The effect of genetic drift in a young genetically isolated population. *Ann Hum Genet.* 2005;69:288-295.
8. Dawber TR, Meadors GF, Moore FE, Jr. Epidemiological approaches to heart disease: The framingham study. *American journal of public health and the nation's health.* 1951;41:279-281.
9. Genes for Cerebral Hemorrhage on Anticoagulation Collaborative G. Exploiting common genetic variation to make anticoagulation safer. *Stroke; a journal of cerebral circulation.* 2009;40:S64-66.
10. Tobin MD, Tomaszewski M, Braund PS, Hajat C, Raleigh SM, Palmer TM, et al. Common variants in genes underlying monogenic hypertension and hypotension and blood pressure in the general population. *Hypertension.* 2008;51:1658-1664.
11. Jorgensen T, Borch-Johnsen K, Thomsen TF, Ibsen H, Glumer C, Pisinger C. A randomized non-pharmacological intervention study for prevention of ischaemic heart disease: Baseline results inter99. *European journal of cardiovascular prevention and rehabilitation : official journal of the European Society of Cardiology, Working Groups on Epidemiology & Prevention and Cardiac Rehabilitation and Exercise Physiology.* 2003;10:377-386.
12. Holle R, Happich M, Lowel H, Wichmann HE, Group MKS. Kora--a research platform for population based health research. *Gesundheitswesen.* 2005;67 Suppl 1:S19-25.
13. Zemunik T, Boban M, Lauc G, Jankovic S, Rotim K, Vataavuk Z, et al. Genome-wide association study of biochemical traits in Korcula island, Croatia. *Croatian medical journal.* 2009;50:23-33.
14. Scholtens S, Smidt N, Swertz MA, Bakker SJ, Dotinga A, Vonk JM, et al. Cohort profile: Lifelines, a three-generation cohort study and biobank. *International journal of epidemiology.* 2015;44:1172-1180.
15. Grobbee DE, Hoes AW, Verheij TJ, Schrijvers AJ, van Ameijden EJ, Numans ME. The utrecht health project: Optimization of routine healthcare data for research. *Eur J Epidemiol.* 2005;20:285-287.
16. Bild DE, Bluemke DA, Burke GL, Detrano R, Diez Roux AV, Folsom AR, et al. Multi-ethnic study of atherosclerosis: Objectives and design. *Am J Epidemiol.* 2002;156:871-881.
17. de Mutsert R, den Heijer M, Rabelink TJ, Smit JW, Romijn JA, Jukema JW, et al. The Netherlands epidemiology of obesity (neo) study: Study design and data collection. *Eur J Epidemiol.* 2013;28:513-523.
18. Hofman A, Brusselle GG, Darwish Murad S, van Duijn CM, Franco OH, Goedegebure A, et al. The Rotterdam study: 2016 objectives and design update. *Eur J Epidemiol.* 2015;30:661-708.
19. Smith BH, Campbell A, Linksted P, Fitzpatrick B, Jackson C, Kerr SM, et al. Cohort profile: Generation Scotland: Scottish family health study (gs:SFHS). The study, its participants and their potential for genetic research on health and illness. *International journal of epidemiology.* 2013;42:689-700.
20. Volzke H, Alte D, Schmidt CO, Radke D, Lorbeer R, Friedrich N, et al. Cohort profile: The study of health in Pomerania. *International journal of epidemiology.* 2011;40:294-307.
21. Spector TD, MacGregor AJ. The St. Thomas' UK adult twin registry. *Twin research : the official journal of the International Society for Twin Studies.* 2002;5:440-443.

22. Design of the women's health initiative clinical trial and observational study. The women's health initiative study group. *Controlled clinical trials*. 1998;19:61-109.
23. Raitakari OT, Juonala M, Ronnema T, Keltikangas-Jarvinen L, Rasanen L, Pietikainen M, et al. Cohort profile: The cardiovascular risk in young finns study. *International journal of epidemiology*. 2008;37:1220-1226.
24. Taylor HA, Jr., Wilson JG, Jones DW, Sarpong DF, Srinivasan A, Garrison RJ, et al. Toward resolution of cardiovascular health disparities in african americans: Design and methods of the jackson heart study. *Ethnicity & disease*. 2005;15:S6-4-17.
25. Chambers JC, Zhao J, Terracciano CM, Bezzina CR, Zhang W, Kaba R, et al. Genetic variation in scn10a influences cardiac conduction. *Nat Genet*. 2010;42:149-152.
26. Holm H, Gudbjartsson DF, Arnar DO, Thorleifsson G, Thorgeirsson G, Stefansdottir H, et al. Several common variants modulate heart rate, pr interval and qrs duration. *Nat Genet*. 2010;42:117-122.
27. Ritchie MD, Denny JC, Zuvich RL, Crawford DC, Schildcrout JS, Bastarache L, et al. Genome- and phenome-wide analyses of cardiac conduction identifies markers of arrhythmia risk. *Circulation*. 2013;127:1377-1385.
28. Behr ER, Savio-Galimberti E, Barc J, Holst AG, Petropoulou E, Prins BP, et al. Role of common and rare variants in scn10a: Results from the brugada syndrome qrs locus gene discovery collaborative study. *Cardiovasc Res*. 2015;106:520-529.
29. Faber CG, Lauria G, Merkies IS, Cheng X, Han C, Ahn HS, et al. Gain-of-function nav1.8 mutations in painful neuropathy. *Proc Natl Acad Sci U S A*. 2012;109:19444-19449.
30. Rannals MD, Page SC, Campbell MN, Gallo RA, Mayfield B, Maher BJ. Neurodevelopmental models of transcription factor 4 deficiency converge on a common ion channel as a potential therapeutic target for pitt hopkins syndrome. *Rare diseases*. 2016;4:e1220468.
31. Chen X, Yu L, Shi S, Jiang H, Huang C, Desai M, et al. Neuronal nav1.8 channels as a novel therapeutic target of acute atrial fibrillation prevention. *Journal of the American Heart Association*. 2016;5
32. Smith JG, Magnani JW, Palmer C, Meng YA, Soliman EZ, Musani SK, et al. Genome-wide association studies of the pr interval in african americans. *PLoS Genet*. 2011;7:e1001304.
33. Butler AM, Yin X, Evans DS, Nalls MA, Smith EN, Tanaka T, et al. Novel loci associated with pr interval in a genome-wide association study of 10 african american cohorts. *Circ Cardiovasc Genet*. 2012;5:639-646.
34. Makita N, Behr E, Shimizu W, Horie M, Sunami A, Crotti L, et al. The e1784k mutation in scn5a is associated with mixed clinical phenotype of type 3 long qt syndrome. *J Clin Invest*. 2008;118:2219-2229.
35. Ellinor PT, Nam EG, Shea MA, Milan DJ, Ruskin JN, MacRae CA. Cardiac sodium channel mutation in atrial fibrillation. *Heart Rhythm*. 2008;5:99-105.
36. Hershberger RE, Parks SB, Kushner JD, Li D, Ludwigsen S, Jakobs P, et al. Coding sequence mutations identified in myh7, tnnt2, scn5a, csrp3, lbd3, and tcap from 313 patients with familial or idiopathic dilated cardiomyopathy. *Clinical and translational science*. 2008;1:21-26.
37. Wang DW, Viswanathan PC, Balser JR, George AL, Jr., Benson DW. Clinical, genetic, and biophysical characterization of scn5a mutations associated with atrioventricular conduction block. *Circulation*. 2002;105:341-346.
38. Wang DW, Yazawa K, George AL, Jr., Bennett PB. Characterization of human cardiac na<sup>+</sup> channel mutations in the congenital long qt syndrome. *Proc Natl Acad Sci U S A*. 1996;93:13200-13205.
39. Pfeufer A, van Noord C, Marcianti KD, Arking DE, Larson MG, Smith AV, et al. Genome-wide association study of pr interval. *Nat Genet*. 2010;42:153-159.
40. Ellinor PT, Lunetta KL, Albert CM, Glazer NL, Ritchie MD, Smith AV, et al. Meta-analysis identifies six new susceptibility loci for atrial fibrillation. *Nat Genet*. 2012;44:670-675.
41. Verweij N, Mateo Leach I, van den Boogaard M, van Veldhuisen DJ, Christoffels VM, LifeLines Cohort S, et al. Genetic determinants of p wave duration and pr segment. *Circ Cardiovasc Genet*. 2014;7:475-481.
42. Kim CA, Delepine M, Boutet E, El Mourabit H, Le Lay S, Meier M, et al. Association of a homozygous nonsense caveolin-1 mutation with berardinelli-seip congenital lipodystrophy. *The Journal of clinical endocrinology and metabolism*. 2008;93:1129-1134.

43. Austin ED, Ma L, LeDuc C, Berman Rosenzweig E, Borczuk A, Phillips JA, 3rd, et al. Whole exome sequencing to identify a novel gene (caveolin-1) associated with human pulmonary arterial hypertension. *Circ Cardiovasc Genet*. 2012;5:336-343.
44. Cao H, Alston L, Ruschman J, Hegele RA. Heterozygous cav1 frameshift mutations (mim 601047) in patients with atypical partial lipodystrophy and hypertriglyceridemia. *Lipids in health and disease*. 2008;7:3.
45. Fra AM, Mastroianni N, Mancini M, Pasqualetto E, Sitia R. Human caveolin-1 and caveolin-2 are closely linked genes colocalized with wi-5336 in a region of 7q31 frequently deleted in tumors. *Genomics*. 1999;56:355-356.
46. Trajkovski M, Hausser J, Soutschek J, Bhat B, Akin A, Zavalan M, et al. MicroRNAs 103 and 107 regulate insulin sensitivity. *Nature*. 2011;474:649-653.
47. Forrester SJ, Elliott KJ, Kawai T, Obama T, Boyer MJ, Preston KJ, et al. Caveolin-1 deletion prevents hypertensive vascular remodeling induced by angiotensin ii. *Hypertension*. 2017;69:79-86.
48. Akilesh S, Suleiman H, Yu H, Stander MC, Lavin P, Gbadegesin R, et al. Arhgap24 inactivates rac1 in mouse podocytes, and a mutant form is associated with familial focal segmental glomerulosclerosis. *J Clin Invest*. 2011;121:4127-4137.
49. Nishi T, Takahashi H, Hashimura M, Yoshida T, Ohta Y, Saegusa M. Filgap, a rac-specific rho gtpase-activating protein, is a novel prognostic factor for follicular lymphoma. *Cancer medicine*. 2015;4:808-818.
50. den Hoed M, Eijgelsheim M, Esko T, Brundel BJ, Peal DS, Evans DM, et al. Identification of heart rate-associated loci and their effects on cardiac conduction and rhythm disorders. *Nat Genet*. 2013;45:621-631.
51. Eijgelsheim M, Newton-Cheh C, Sotoodehnia N, de Bakker PI, Muller M, Morrison AC, et al. Genome-wide association analysis identifies multiple loci related to resting heart rate. *Hum Mol Genet*. 2010;19:3885-3894.
52. Li J, Gao Z, Wang X, Liu H, Zhang Y, Liu Z. Identification and functional analysis of long intergenic noncoding rna genes in porcine pre-implantation embryonic development. *Scientific reports*. 2016;6:38333.
53. Winkelmann J, Schormair B, Lichtner P, Ripke S, Xiong L, Jalilzadeh S, et al. Genome-wide association study of restless legs syndrome identifies common variants in three genomic regions. *Nat Genet*. 2007;39:1000-1006.
54. Xiong L, Catoire H, Dion P, Gaspar C, Lafreniere RG, Girard SL, et al. Meis1 intronic risk haplotype associated with restless legs syndrome affects its mrna and protein expression levels. *Hum Mol Genet*. 2009;18:1065-1074.
55. Spieler D, Kaffe M, Knauf F, Bessa J, Tena JJ, Giesert F, et al. Restless legs syndrome-associated intronic common variant in meis1 alters enhancer function in the developing telencephalon. *Genome Res*. 2014;24:592-603.
56. Mahmoud AI, Kocabas F, Muralidhar SA, Kimura W, Koura AS, Thet S, et al. Meis1 regulates postnatal cardiomyocyte cell cycle arrest. *Nature*. 2013;497:249-253.
57. Linden H, Williams R, King J, Blair E, Kini U. Ulnar mammary syndrome and tbx3: Expanding the phenotype. *American journal of medical genetics. Part A*. 2009;149A:2809-2812.
58. Hoogaars WM, Engel A, Brons JF, Verkerk AO, de Lange FJ, Wong LY, et al. Tbx3 controls the sinoatrial node gene program and imposes pacemaker function on the atria. *Genes & development*. 2007;21:1098-1112.
59. Sotoodehnia N, Isaacs A, de Bakker PI, Dorr M, Newton-Cheh C, Nolte IM, et al. Common variants in 22 loci are associated with qrs duration and cardiac ventricular conduction. *Nat Genet*. 2010;42:1068-1076.
60. Jhang WK, Lee BH, Kim GH, Lee JO, Yoo HW. Clinical and molecular characterisation of holt-oram syndrome focusing on cardiac manifestations. *Cardiology in the young*. 2015;25:1093-1098.
61. Wang ZC, Ji WH, Ruan CW, Liu XY, Qiu XB, Yuan F, et al. Prevalence and spectrum of tbx5 mutation in patients with lone atrial fibrillation. *International journal of medical sciences*. 2016;13:60-67.
62. Baban A, Postma AV, Marini M, Trocchio G, Santilli A, Pelegrini M, et al. Identification of tbx5 mutations in a series of 94 patients with tetralogy of fallot. *American journal of medical genetics. Part A*. 2014;164A:3100-3107.

63. Hiroi Y, Kudoh S, Monzen K, Ikeda Y, Yazaki Y, Nagai R, et al. Tbx5 associates with nkx2-5 and synergistically promotes cardiomyocyte differentiation. *Nat Genet.* 2001;28:276-280.
64. Garg V, Kathiriyai IS, Barnes R, Schluterman MK, King IN, Butler CA, et al. Gata4 mutations cause human congenital heart defects and reveal an interaction with tbx5. *Nature.* 2003;424:443-447.
65. Moskowitz IP, Kim JB, Moore ML, Wolf CM, Peterson MA, Shendure J, et al. A molecular pathway including id2, tbx5, and nkx2-5 required for cardiac conduction system development. *Cell.* 2007;129:1365-1376.
66. Daigo Y, Nishiwaki T, Kawasoe T, Tamari M, Tsuchiya E, Nakamura Y. Molecular cloning of a candidate tumor suppressor gene, dlc1, from chromosome 3p21.3. *Cancer research.* 1999;59:1966-1972.
67. Audas TE, Li Y, Liang G, Lu R. A novel protein, luman/creb3 recruitment factor, inhibits luman activation of the unfolded protein response. *Molecular and cellular biology.* 2008;28:3952-3966.
68. Arking DE, Pulit SL, Crotti L, van der Harst P, Munroe PB, Koopmann TT, et al. Genetic association study of qt interval highlights role for calcium signaling pathways in myocardial repolarization. *Nat Genet.* 2014;46:826-836.
69. Nolte IM, Wallace C, Newhouse SJ, Waggott D, Fu J, Soranzo N, et al. Common genetic variation near the phospholamban gene is associated with cardiac repolarisation: Meta-analysis of three genome-wide association studies. *PLoS ONE.* 2009;4:e6138.
70. Szafranski P, Von Allmen GK, Graham BH, Wilfong AA, Kang SH, Ferreira JA, et al. 6q22.1 microdeletion and susceptibility to pediatric epilepsy. *Eur J Hum Genet.* 2015;23:173-179.
71. Vasani RS, Glazer NL, Felix JF, Lieb W, Wild PS, Felix SB, et al. Genetic variants associated with cardiac structure and function: A meta-analysis and replication of genome-wide association data. *JAMA.* 2009;302:168-178.
72. Steinhorsdottir V, Thorleifsson G, Sulem P, Helgason H, Grarup N, Sigurdsson A, et al. Identification of low-frequency and rare sequence variants associated with elevated or reduced risk of type 2 diabetes. *Nat Genet.* 2014;46:294-298.
73. Fuchsberger C, Flannick J, Teslovich TM, Mahajan A, Agarwala V, Gaulton KJ, et al. The genetic architecture of type 2 diabetes. *Nature.* 2016;536:41-47.
74. Czyzyk TA, Ning Y, Hsu MS, Peng B, Mains RE, Eipper BA, et al. Deletion of peptide amidation enzymatic activity leads to edema and embryonic lethality in the mouse. *Dev Biol.* 2005;287:301-313.
75. Prigge ST, Mains RE, Eipper BA, Amzel LM. New insights into copper monooxygenases and peptide amidation: Structure, mechanism and function. *Cell Mol Life Sci.* 2000;57:1236-1259.
76. Braas KM, Stoffers DA, Eipper BA, May V. Tissue specific expression of rat peptidylglycine alpha-amidating monooxygenase activity and mrna. *Molecular endocrinology.* 1989;3:1387-1398.
77. Girard B, Ouafik L, Boudouresque F. Characterization and regulation of peptidylglycine alpha-amidating monooxygenase (pam) expression in h9c2 cardiac myoblasts. *Cell and tissue research.* 1999;298:489-497.
78. Nishiwaki T, Daigo Y, Tamari M, Fujii Y, Nakamura Y. Molecular cloning, mapping, and characterization of two novel human genes, orctl3 and orctl4, bearing homology to organic-cation transporters. *Cytogenetics and cell genetics.* 1998;83:251-255.
79. Zain SM, Mohamed R, Cooper DN, Razali R, Rampal S, Mahadeva S, et al. Genome-wide analysis of copy number variation identifies candidate gene loci associated with the progression of non-alcoholic fatty liver disease. *PLoS ONE.* 2014;9:e95604.
80. Zender L, Xue W, Zuber J, Semighini CP, Krasnitz A, Ma B, et al. An oncogenomics-based in vivo RNAi screen identifies tumor suppressors in liver cancer. *Cell.* 2008;135:852-864.
81. Lipowsky G, Bischoff FR, Schwarzmaier P, Kraft R, Kostka S, Hartmann E, et al. Exportin 4: A mediator of a novel nuclear export pathway in higher eukaryotes. *EMBO J.* 2000;19:4362-4371.
82. Ellis KL, Zhou Y, Beshansky JR, Ainehsazan E, Selker HP, Cupples LA, et al. Genetic modifiers of response to glucose-insulin-potassium (GIK) infusion in acute coronary syndromes and associations with clinical outcomes in the immediate trial. *Pharmacogenomics J.* 2015;15:488-495.
83. Herman DS, Lam L, Taylor MR, Wang L, Teekakirikul P, Christodoulou D, et al. Truncations of titin causing dilated cardiomyopathy. *N Engl J Med.* 2012;366:619-628.
84. LeWinter MM, Granzier HL. Titin is a major human disease gene. *Circulation.* 2013;127:938-944.



85. Taylor M, Graw S, Sinagra G, Barnes C, Slavov D, Brun F, et al. Genetic variation in titin in arrhythmogenic right ventricular cardiomyopathy-overlap syndromes. *Circulation*. 2011;124:876-885.
86. Hackman P, Vihola A, Haravuori H, Marchand S, Sarparanta J, De Seze J, et al. Tibial muscular dystrophy is a titinopathy caused by mutations in ttn, the gene encoding the giant skeletal-muscle protein titin. *American journal of human genetics*. 2002;71:492-500.
87. Hackman P, Marchand S, Sarparanta J, Vihola A, Penisson-Besnier I, Eymard B, et al. Truncating mutations in c-terminal titin may cause more severe tibial muscular dystrophy (tmd). *Neuromuscular disorders : NMD*. 2008;18:922-928.
88. Lange S, Xiang F, Yakovenko A, Vihola A, Hackman P, Rostkova E, et al. The kinase domain of titin controls muscle gene expression and protein turnover. *Science*. 2005;308:1599-1603.
89. Ceyhan-Birsoy O, Agrawal PB, Hidalgo C, Schmitz-Abe K, DeChene ET, Swanson LC, et al. Recessive truncating titin gene, ttn, mutations presenting as centronuclear myopathy. *Neurology*. 2013;81:1205-1214.
90. Gerull B. The rapidly evolving role of titin in cardiac physiology and cardiomyopathy. *The Canadian journal of cardiology*. 2015;31:1351-1359.
91. Coppe JP, Itahana Y, Moore DH, Bennington JL, Desprez PY. Id-1 and id-2 proteins as molecular markers for human prostate cancer progression. *Clin Cancer Res*. 2004;10:2044-2051.
92. Langlands K, Down GA, Kealey T. Id proteins are dynamically expressed in normal epidermis and dysregulated in squamous cell carcinoma. *Cancer research*. 2000;60:5929-5933.
93. Rockman SP, Currie SA, Ciavarella M, Vincan E, Dow C, Thomas RJ, et al. Id2 is a target of the beta-catenin/cell factor pathway in colon carcinoma. *J Biol Chem*. 2001;276:45113-45119.
94. Kleeff J, Ishiwata T, Friess H, Buchler MW, Israel MA, Korc M. The helix-loop-helix protein id2 is overexpressed in human pancreatic cancer. *Cancer research*. 1998;58:3769-3772.
95. Lasorella A, Boldrini R, Dominici C, Donfrancesco A, Yokota Y, Inserra A, et al. Id2 is critical for cellular proliferation and is the oncogenic effector of n-myc in human neuroblastoma. *Cancer research*. 2002;62:301-306.
96. Yokota Y, Mori S. Role of id family proteins in growth control. *Journal of cellular physiology*. 2002;190:21-28.
97. Wiczorek A, Balwierz W. The role of id2 protein in neuroblastoma in children. *Pathology oncology research : POR*. 2015;21:999-1004.
98. Evans SM, O'Brien TX. Expression of the helix-loop-helix factor id during mouse embryonic development. *Dev Biol*. 1993;159:485-499.
99. Jen Y, Manova K, Benezra R. Expression patterns of id1, id2, and id3 are highly related but distinct from that of id4 during mouse embryogenesis. *Developmental dynamics : an official publication of the American Association of Anatomists*. 1996;207:235-252.
100. Glowacki G, Braren R, Firner K, Nissen M, Kuhl M, Reche P, et al. The family of toxin-related ecto-adp-ribosyltransferases in humans and the mouse. *Protein Sci*. 2002;11:1657-1670.
101. Beqqali A, Kloots J, Ward-van Oostwaard D, Mummery C, Passier R. Genome-wide transcriptional profiling of human embryonic stem cells differentiating to cardiomyocytes. *Stem cells*. 2006;24:1956-1967.
102. Smith SJ, Towers N, Saldanha JW, Shang CA, Mahmood SR, Taylor WR, et al. The cardiac-restricted protein adp-ribosylhydrolase-like 1 is essential for heart chamber outgrowth and acts on muscle actin filament assembly. *Dev Biol*. 2016;416:373-388.
103. Eeles RA, Olama AA, Benlloch S, Saunders EJ, Leongamornlert DA, Tymrakiewicz M, et al. Identification of 23 new prostate cancer susceptibility loci using the icogs custom genotyping array. *Nat Genet*. 2013;45:385-391, 391e381-382.
104. Comuzzie AG, Cole SA, Laston SL, Voruganti VS, Haack K, Gibbs RA, et al. Novel genetic loci identified for the pathophysiology of childhood obesity in the hispanic population. *PLoS ONE*. 2012;7:e51954.
105. Chambers JC, Zhang W, Sehmi J, Li X, Wass MN, Van der Harst P, et al. Genome-wide association study identifies loci influencing concentrations of liver enzymes in plasma. *Nat Genet*. 2011;43:1131-1138.

106. Hart AB, Engelhardt BE, Wardle MC, Sokoloff G, Stephens M, de Wit H, et al. Genome-wide association study of d-amphetamine response in healthy volunteers identifies putative associations, including cadherin 13 (*cdh13*). *PLoS ONE*. 2012;7:e42646.
107. Behr ER, Ritchie MD, Tanaka T, Kaab S, Crawford DC, Nicoletti P, et al. Genome wide analysis of drug-induced torsades de pointes: Lack of common variants with large effect sizes. *PLoS ONE*. 2013;8:e78511.
108. Lubitz SA, Brody JA, Bihlmeyer NA, Roselli C, Weng LC, Christophersen IE, et al. Whole exome sequencing in atrial fibrillation. *PLoS Genet*. 2016;12:e1006284.
109. Lutz SM, Cho MH, Young K, Hersh CP, Castaldi PJ, McDonald ML, et al. A genome-wide association study identifies risk loci for spirometric measures among smokers of european and african ancestry. *BMC Genet*. 2015;16:138.
110. Dina C, Bouatia-Naji N, Tucker N, Dellings FN, Toomer K, Durst R, et al. Genetic association analyses highlight biological pathways underlying mitral valve prolapse. *Nat Genet*. 2015;47:1206-1211.
111. Lane JM, Vlasac I, Anderson SG, Kyle SD, Dixon WG, Bechtold DA, et al. Genome-wide association analysis identifies novel loci for chronotype in 100,420 individuals from the uk biobank. *Nature communications*. 2016;7:10889.
112. Wang K, Li WD, Zhang CK, Wang Z, Glessner JT, Grant SF, et al. A genome-wide association study on obesity and obesity-related traits. *PLoS ONE*. 2011;6:e18939.
113. Herold C, Hooli BV, Mullin K, Liu T, Roehr JT, Mattheisen M, et al. Family-based association analyses of imputed genotypes reveal genome-wide significant association of alzheimer's disease with *osbp16*, *ptprg*, and *pdcl3*. *Mol Psychiatry*. 2016;21:1608-1612.
114. Gee HY, Sadowski CE, Aggarwal PK, Porath JD, Yakulov TA, Schueler M, et al. *Fat1* mutations cause a glomerulotubular nephropathy. *Nature communications*. 2016;7:10822.
115. Morris LG, Kaufman AM, Gong Y, Ramaswami D, Walsh LA, Turcan S, et al. Recurrent somatic mutation of *fat1* in multiple human cancers leads to aberrant wnt activation. *Nat Genet*. 2013;45:253-261.
116. Surakka I, Horikoshi M, Magi R, Sarin AP, Mahajan A, Lagou V, et al. The impact of low-frequency and rare variants on lipid levels. *Nat Genet*. 2015;47:589-597.
117. Albrechtsen A, Grarup N, Li Y, Sparso T, Tian G, Cao H, et al. Exome sequencing-driven discovery of coding polymorphisms associated with common metabolic phenotypes. *Diabetologia*. 2013;56:298-310.
118. Chen HJ, Lin CM, Lin CS, Perez-Olle R, Leung CL, Liem RK. The role of microtubule actin cross-linking factor 1 (*macf1*) in the wnt signaling pathway. *Genes & development*. 2006;20:1933-1945.
119. Gupta T, Marlow FL, Ferriola D, Mackiewicz K, Dapprich J, Monos D, et al. Microtubule actin crosslinking factor 1 regulates the balbiani body and animal-vegetal polarity of the zebrafish oocyte. *PLoS Genet*. 2010;6:e1001073.
120. Sun Y, Zhang J, Kraeft SK, Auclair D, Chang MS, Liu Y, et al. Molecular cloning and characterization of human trabeculin-alpha, a giant protein defining a new family of actin-binding proteins. *J Biol Chem*. 1999;274:33522-33530.
121. Fassett JT, Xu X, Kwak D, Wang H, Liu X, Hu X, et al. Microtubule actin cross-linking factor 1 regulates cardiomyocyte microtubule distribution and adaptation to hemodynamic overload. *PLoS ONE*. 2013;8:e73887.
122. Doherty GJ, McMahon HT. Mediation, modulation, and consequences of membrane-cytoskeleton interactions. *Annual review of biophysics*. 2008;37:65-95.
123. Karakesisoglou I, Yang Y, Fuchs E. An epidermal plakin that integrates actin and microtubule networks at cellular junctions. *J Cell Biol*. 2000;149:195-208.
124. Wu X, Kodama A, Fuchs E. *Acf7* regulates cytoskeletal-focal adhesion dynamics and migration and has atpase activity. *Cell*. 2008;135:137-148.
125. Lin CM, Chen HJ, Leung CL, Parry DA, Liem RK. Microtubule actin crosslinking factor 1b: A novel plakin that localizes to the golgi complex. *J Cell Sci*. 2005;118:3727-3738.
126. Deo R, Nalls MA, Avery CL, Smith JG, Evans DS, Keller MF, et al. Common genetic variation near the *connexin-43* gene is associated with resting heart rate in african americans: A genome-wide association study of 13,372 participants. *Heart Rhythm*. 2013;10:401-408.

127. Dasgupta C, Martinez AM, Zuppan CW, Shah MM, Bailey LL, Fletcher WH. Identification of connexin43 (alpha1) gap junction gene mutations in patients with hypoplastic left heart syndrome by denaturing gradient gel electrophoresis (dgge). *Mutat Res*. 2001;479:173-186.
128. Sinner MF, Tucker NR, Lunetta KL, Ozaki K, Smith JG, Trompet S, et al. Integrating genetic, transcriptional, and functional analyses to identify 5 novel genes for atrial fibrillation. *Circulation*. 2014;130:1225-1235.
129. Li WE, Waldo K, Linask KL, Chen T, Wessels A, Parmacek MS, et al. An essential role for connexin43 gap junctions in mouse coronary artery development. *Development*. 2002;129:2031-2042.
130. Britz-Cunningham SH, Shah MM, Zuppan CW, Fletcher WH. Mutations of the connexin43 gap-junction gene in patients with heart malformations and defects of laterality. *N Engl J Med*. 1995;332:1323-1329.
131. Severs NJ. Cardiac muscle cell interaction: From microanatomy to the molecular make-up of the gap junction. *Histol Histopathol*. 1995;10:481-501.
132. Global Lipids Genetics C, Willer CJ, Schmidt EM, Sengupta S, Peloso GM, Gustafsson S, et al. Discovery and refinement of loci associated with lipid levels. *Nat Genet*. 2013;45:1274-1283.
133. Teslovich TM, Musunuru K, Smith AV, Edmondson AC, Stylianou IM, Koseki M, et al. Biological, clinical and population relevance of 95 loci for blood lipids. *Nature*. 2010;466:707-713.
134. Waterworth DM, Ricketts SL, Song K, Chen L, Zhao JH, Ripatti S, et al. Genetic variants influencing circulating lipid levels and risk of coronary artery disease. *Arterioscler Thromb Vasc Biol*. 2010;30:2264-2276.
135. Meyer C, Kowarz E, Hofmann J, Renneville A, Zuna J, Trka J, et al. New insights to the mll recombinome of acute leukemias. *Leukemia*. 2009;23:1490-1499.
136. de Vries PS, Chasman DI, Sabater-Lleal M, Chen MH, Huffman JE, Steri M, et al. A meta-analysis of 120 246 individuals identifies 18 new loci for fibrinogen concentration. *Hum Mol Genet*. 2016;25:358-370.
137. Hoglinger GU, Melhem NM, Dickson DW, Sleiman PM, Wang LS, Klei L, et al. Identification of common variants influencing risk of the tauopathy progressive supranuclear palsy. *Nat Genet*. 2011;43:699-705.
138. Dirkx E, Gladka MM, Philippen LE, Armand AS, Kinet V, Leptidis S, et al. Nfat and mir-25 cooperate to reactivate the transcription factor hand2 in heart failure. *Nature cell biology*. 2013;15:1282-1293.
139. Shen L, Li XF, Shen AD, Wang Q, Liu CX, Guo YJ, et al. Transcription factor hand2 mutations in sporadic chinese patients with congenital heart disease. *Chin Med J (Engl)*. 2010;123:1623-1627.
140. McFadden DG, Barbosa AC, Richardson JA, Schneider MD, Srivastava D, Olson EN. The hand1 and hand2 transcription factors regulate expansion of the embryonic cardiac ventricles in a gene dosage-dependent manner. *Development*. 2005;132:189-201.
141. Srivastava D, Cserjesi P, Olson EN. A subclass of bhlh proteins required for cardiac morphogenesis. *Science*. 1995;270:1995-1999.
142. Yelon D, Ticho B, Halpern ME, Ruvinsky I, Ho RK, Silver LM, et al. The bhlh transcription factor hand2 plays parallel roles in zebrafish heart and pectoral fin development. *Development*. 2000;127:2573-2582.
143. Zhao Y, Samal E, Srivastava D. Serum response factor regulates a muscle-specific microRNA that targets hand2 during cardiogenesis. *Nature*. 2005;436:214-220.
144. Shin SY, Fauman EB, Petersen AK, Krumsiek J, Santos R, Huang J, et al. An atlas of genetic influences on human blood metabolites. *Nat Genet*. 2014;46:543-550.
145. Brown EL, Below JE, Fischer RS, Essigmann HT, Hu H, Huff C, et al. Genome-wide association study of staphylococcus aureus carriage in a community-based sample of mexican-americans in starr county, texas. *PLoS ONE*. 2015;10:e0142130.
146. Baumgartner MR, Hu CA, Almashanu S, Steel G, Obie C, Aral B, et al. Hyperammonemia with reduced ornithine, citrulline, arginine and proline: A new inborn error caused by a mutation in the gene encoding delta(1)-pyrroline-5-carboxylate synthase. *Hum Mol Genet*. 2000;9:2853-2858.
147. Skidmore DL, Chitayat D, Morgan T, Hinek A, Fischer B, Dimopoulou A, et al. Further expansion of the phenotypic spectrum associated with mutations in aldh18a1, encoding delta(1)-pyrroline-5-carboxylate synthase (p5cs). *American journal of medical genetics. Part A*. 2011;155A:1848-1856.
148. Consortium GT. Human genomics. The genotype-tissue expression (gtex) pilot analysis: Multitissue gene regulation in humans. *Science*. 2015;348:648-660.
